# Supplementary material for: Hygroscopicity of organic surrogate compounds from biomass burning and their effect on the efflorescence of ammonium sulfate in mixed aerosol particles
Source: Copernicus journal article supplement (doi:10.5194/acp-2017-549), 2017-06-20
Supplement: Supplementary file [file acp-2017-549-AC1-supplement.zip]

1 **Hygroscopicity of organic surrogate compounds from**  
2 **biomass burning and their effect on the efflorescence of**  
3 **ammonium sulfate in mixed aerosol particles**

4 Ting Lei<sup>1,2</sup>, Andreas Zuend<sup>4</sup>, Yafang Cheng<sup>2,3</sup>, Hang Su<sup>2,3</sup>, Weigang Wang<sup>1</sup>, Maofa Ge<sup>1\*</sup>

5 <sup>1</sup>State Key Laboratory for Structural Chemistry of Unstable and Stable Species, CAS  
6 Research/Education Center for Excellence in Molecular Sciences, Institute of Chemistry, Chinese  
7 Academy of Sciences, Beijing, 100190, P. R. China

8 <sup>2</sup>Multiphase Department, Max Planck Institute for Chemistry, Mainz 55128, Germany

9 <sup>3</sup>Institute for Environmental and Climate Research, Jinan University, Guangzhou, China

10 <sup>4</sup>Department of Atmospheric and Oceanic Sciences, McGill University, Montreal, Quebec, Canada

11 *Correspondence to:* M. F. Ge ([gemaofa@iccas.ac.cn](mailto:gemaofa@iccas.ac.cn))

12

13 **Abstract:** Hygroscopic growth factors of organic surrogate compounds representing biomass burning  
14 and mixed organic-inorganic aerosol particles exhibit variability during dehydration experiments  
15 depending on their chemical composition, which we observed using a hygroscopicity tandem differential  
16 mobility analyzer (HTDMA). We observed that levoglucosan and humic acid aerosol particles release  
17 water upon dehumidification in the range from 90 – 5 % relative humidity (RH). 4-Hydroxybenzoic acid  
18 aerosol particles, however, remain in the solid state both upon dehumidification or dehumidification and  
19 exhibit a small shrinking in size at higher RH compared to the dry size. For example, the measured  
20 growth factor of 4-hydroxybenzoic acid aerosol particles is ~0.96 at 90 % RH. The measurements were  
21 accompanied by RH-dependent thermodynamic equilibrium calculations using the AIOMFAC and the  
22 E-AIM models, the ZSR relation, and a fitted hygroscopicity expression. We observed several effects of  
23 organic components on the hygroscopicity behavior of mixtures containing ammonium sulfate (AS) in  
24 relation to the different mass fractions of organic compounds: (1) a shift of efflorescence relative  
25 humidity (ERH) of ammonium sulfate to higher RH due to the presence of 25 wt % levoglucosan in the  
26 mixture. (2) There is a distinct efflorescence transition at 25 % RH for mixtures consisting of 25 wt % of  
27 4-hydroxybenzoic acid compared to the ERH at 35 % for organic-free AS particles. (3) There is indication  
28 for a liquid-to-solid phase transition of 4-hydroxybenzoic acid in the mixed particles during dehydration.

29 (4) A humic acid component shows no significant effect on the efflorescence of AS in mixed aerosol  
30 particles. In addition, consideration of a composition-dependent degree of dissolution of crystallization  
31 AS (solid-liquid equilibrium) in the AIOMFAC and E-AIM models leads to a relatively good agreement  
32 between models and observed growth factors, as well as ERH of AS in the mixed system. The use of the  
33 ZSR relation leads to good agreement with measured diameter growth factors of aerosol particles  
34 containing humic acid and ammonium sulfate. Lastly, two distinct mixtures of organic surrogate  
35 compounds, including levoglucosan, 4-hydroxybenzoic acid, and humic acid were used to represent the  
36 average water-soluble organic carbon (WSOC) fractions observed during the wet and dry seasons in the  
37 central Amazon Basin. A comparison of the organic fraction's hygroscopicity parameter for the simple  
38 mixtures, e.g.  $\kappa \approx 0.12$  to  $0.15$  for the wet-season mixture in the 90 % to 40 % RH range, shows good  
39 agreement with field data for the wet season in Amazon (WSOC  $\kappa \approx 0.14 \pm 0.06$  at 90 % RH). This  
40 suggests that laboratory-generated mixtures containing organic surrogate compounds and ammonium  
41 sulfate can be used to mimic, in a simplified manner, the chemical composition of ambient aerosols from  
42 the Amazon for the purpose of RH-dependent hygroscopicity studies.

### 43 **Introduction**

44 It is well established that biomass burning, as an important source of atmospheric aerosol particles, has  
45 a wide range of climate effects that can be classified into direct radiative effects through light-absorbing  
46 carbon aerosol particles and indirect effects by impact on cloud condensation nuclei and cloud  
47 microphysics (Andreae and Gelencsér, 2006; Moosmüller et al., 2009; Hecobian et al., 2010; Rizzo et  
48 al., 2011; Rose et al., 2011; Cheng et al., 2012; Engelhart et al., 2012; Lack et al., 2012; Jacobson, 2014;  
49 Liu et al., 2014; Saleh et al., 2013, 2014). Atmospheric light-absorbing particles that arise from biomass  
50 burning play an important role as a driver of global warming (Favez et al., 2009; Hegg et al., 2010; Lack  
51 et al., 2012; Feng et al., 2013; Laborde et al., 2013; Srinivas and Sarin, 2013). According to the IPCC  
52 report (Boucher and David, 2013), the climate forcing of black carbon aerosol particles may rival that of  
53 methane, with a present-day global warming effect of up to 0.3–0.4 °C (Wang et al., 2014). Also, certain  
54 types of aerosol particles emitted by biomass burning, when immersed into cloud droplets, absorb solar  
55 radiation and facilitate water evaporation and cloud dispersion, which indicates an additional indirect  
56 aerosol effect that counteracts the cooling effect of cloud droplets nucleated by aerosols (Powelson et al.,  
57 2014). Therefore, a better understanding of the influence of aerosol particles from biomass burning on

58 cloud formation, precipitation, and Earth's radiative budget is required to comprehend biomass burning  
59 aerosol properties and behavior.

60 The understanding of aerosol-cloud-climate impact of a vast range of biomass burning derived organic  
61 compounds, however, is rather limited due to the complexity of biomass burning emissions, gas- and  
62 aerosol-phase processing and the restricted availability of field measurements (Pratt et al., 2011; Lei et  
63 al., 2014; Paglione et al., 2014; Srinivas and Sarin, 2014; Zhong and Jang, 2014; Ciarelli et al., 2015;  
64 Arnold et al., 2015; Lawson et al., 2015; Gilman et al., 2015). Moreover, biomass burning particles are  
65 often mixtures of water-soluble organic carbon, black carbon, varying amounts of inorganic components,  
66 and water insoluble inclusions, such as mineral dust or poorly soluble organics (Väkevä et al., 2002;  
67 Sadezky et al., 2005; Saarnio et al., 2010). An appreciable amount of organic compounds affect the  
68 physicochemical properties of aerosols, such as hygroscopicity, liquid-solid and liquid-liquid phase  
69 transitions, and chemical reactivity in liquid phases and/or on particle surfaces (Shiraiwa et al., 2013).  
70 For example, equilibrium between the variable environmental water vapor mixing ratio and aerosol  
71 particles may lead to substantial changes in particle size, and chemical composition, all of which can  
72 influence light absorption and scattering (Seinfeld and Pandis, 2006; Zhang et al., 2016). RH-dependent  
73 transitions between solid and liquid (aqueous) phases are also important in determining optical properties  
74 (Martin et al., 2013; Wang et al., 2010; Kim et al., 2016; Wu et al., Denjean et al., 2015; 2016; Hodas et  
75 al., 2015; Atkinson et al., 2015). Studies have shown that water-soluble organic matter from biomass  
76 burning (approximately 70 % of total organic matter) can significantly suppress, enhance or have no  
77 effect on the deliquescence (e.g. the RH at which deliquescence occurs at a certain temperature, the DRH)  
78 and efflorescence process (e.g. the efflorescence RH, ERH) of present inorganic electrolytes. The effect  
79 depends predominantly on the type of organics, mass fraction of organics relative to inorganic, and  
80 particle size (You and Bertram, 2014; Zawadowicz et al., 2015; Hodas et al., 2015; Gupta et al., 2015).  
81 Whole particles, individual phases within particles, or specific chemical compounds can undergo a range  
82 of phase transitions including crystallization/efflorescence, dissolution/deliquescence, and liquid-liquid  
83 phase separation as the relative humidity varies in the atmosphere. A number of laboratory studies have  
84 focused on liquid-liquid phase separations within particles consisting of inorganic and organics fractions  
85 (Svenningsson et al., 2006; Carrico et al., 2008; Dusek et al., 2011; Hodas et al., 2015). For example,  
86 studies about liquid-liquid separation occurring in mixed organic-inorganic aerosols were performed by

87 Song et al. (2012, 2013) and You et al. (2013) using Raman and optical microscopy, establishing that  
88 liquid-liquid phase separation occurs typically in mixed organics + ammonium sulfate particles with an  
89 average elemental oxygen-to-carbon (O:C) ratio of the organic fraction of less than 0.6 and in some cases  
90 for  $0.6 < \text{O:C} < 0.8$ . You et al. (2013) further found that for a O:C ratio between 0.5 and 0.8, the  
91 occurrence of liquid-liquid phase separation at moderate to high RH depends on the types of inorganic  
92 salts present (i.e., the effective strength of the salting-out effect), e.g.,  $(\text{NH}_4)_2\text{SO}_4 \geq \text{NH}_4\text{HSO}_4 \geq \text{NaCl} \geq$   
93  $\text{NH}_4\text{NO}_3$ . Recently, the effect of a potential size-dependent morphology and dependence of the phase  
94 separation mechanism on the organic/inorganic mass ratio in mixed aerosol was studied for mixtures of  
95 poly- (ethylene glycol)-400 + ammonium sulfate using cryogenic-transmission electron microscopy  
96 (Altaf et al., 2016). Therefore, many independent studies suggest that the occurrence of solid-liquid  
97 and/or liquid-liquid phase separations, as well as related (temperature-dependent) RH levels of phase  
98 transitions (DRH, ERH, SRH), depend on the relative amounts of organic and inorganic aerosols  
99 components and their non-ideal mixing behavior.

100 The expected physical state and morphology of aerosol particles containing mixtures of a wide range  
101 of organic and inorganic salts/acids can, in principle, be predicted by a selection of specialized  
102 thermodynamic equilibrium models. Such models include the Extended Aerosol Inorganic Model (E-  
103 AIM) (Clegg and Seinfeld, 1998, 2006; available online: <http://www.aim.env.uea.ac.uk/aim/aim.php>),  
104 the Aerosol Diameter Dependent Equilibrium Model (ADDEM) (Topping et al., 2004), the UNiversal  
105 Quasichemical Functional Group Activity Coefficients model (UNIFAC) (Fredenslund et al., 1975;  
106 Hansen et al., 1991), and the Aerosol Inorganic-Organic Mixtures Functional groups Activity  
107 Coefficients model (AIOMFAC) (Zuend et al., 2008, 2011, 2012). These models have all been used to  
108 predict atmospheric aerosol thermodynamic equilibrium for a variety of inorganic and organic systems,  
109 yet not all of them can be used to compute non-ideal mixing in organic-inorganic systems. AIOMFAC  
110 has been used to predict the distribution of components in multiple phases in a range of mixed organic-  
111 inorganic systems and demonstrated its broad applicability in predicting liquid-liquid phase separation  
112 in such mixtures (Zuend et al., 2010; Song et al., 2012; Zuend and Seinfeld, 2012; Shiraiwa et al., 2013;  
113 Renbaum-Woff et al., 2016; Rastak et al., 2017).

114 Several previous experimental studies using the HTDMA technique (e.g. Zardini et al., 2008; Lei et  
115 al. 2014) show that the deliquescence of inorganic compounds is affected by the presence of organic

116 components, which manifests itself in a shift in the DRH of a salt compared to the corresponding organic-  
117 free system. For instance, a clear shift of ammonium sulfate DRH was observed in the case of the  
118 levoglucosan + ammonium sulfate system (Lei et al., 2014). Here we focus on investigating the  
119 morphology, hygroscopicity and phase transitions of relevant organic compounds found in biomass  
120 burning aerosol during the dehydration/dehumidification process. Moreover, we study how the presence  
121 of organic compounds affects the water loss behavior of mixed organic-inorganic aerosols with  
122 ammonium sulfate (AS) in the supersaturated state as well as after efflorescence of AS. In addition, we  
123 compare the measured hygroscopicity behavior of mixed aerosol particles with predictions from the  
124 Zdanovskii–Stokes–Robinson (ZSR) mixing rule, the E-AIM model and the AIOMFAC model.

125

## 126 **2 Methods**

### 127 **2.1 Aerosol system**

128 The three organic compounds levoglucosan, 4-hydroxybenzoic acid and humic acid were used as  
129 surrogates for the rich-class of water-soluble organic components in biomass burning aerosols. The  
130 influence of the distinct chemical structure of these compounds was studied with regard to the water  
131 uptake and evaporation of the pure organic compounds as well as for mixed organic-AS-containing  
132 particles. Furthermore, a comparison with field data from the Amazon was performed to quantify the  
133 ability of mixtures of these three organic compounds to mimicking the hygroscopic behavior of complex  
134 ambient organic particles originating from biomass burning emissions. Here we focus on the  
135 characterization of hygroscopic growth factors as well as solid-liquid and liquid-liquid phase transitions  
136 during the dehumidification conditions. The chemical substances and their physical properties are  
137 characterized in Table 1. All of the experimental solutions were prepared by dissolving in Milli-Q water  
138 (resistivity  $\geq 18.2 \text{ M}\Omega$ ) and the experiments were conducted at room temperature ( $\sim 298 \text{ K}$ ). For the  
139 mixtures of ammonium sulfate and organic surrogates the different mass ratios of AS: organic considered  
140 are 3:1, 1:1 1:3. The chemical compositions of biomass-burning model mixtures are introduced in Table  
141 2.

### 142 **2.2 Instrument design**

143 Figure 1 shows a schematic of the HTDMA instrument, more detailed information about this instrument's  
144 setup, calibration and evaluation is described elsewhere (Lei et al., 2014; Jing et al., 2015, 2017; Liu et  
145 al., 2015). Briefly, Poly-dispersed sub-micrometer aerosol particles are generated by atomizing (MSP  
146 1500, MSP) a 0.05 weight % aqueous solution consisting of different mass fractions of inorganic, and  
147 organic components, assuming that the composition of the formed aerosol particles is initially the same  
148 as that of the solution used in the atomizer. Aerosol particles from an atomizer are routed through  
149 homemade silica diffusion dryers and then pass through a Nafion gas dryer (Perma Pure Inc., USA).  
150 After aerosol particles were dried to below 5 % RH (RH set point 1, RH1), they are directed to the  
151 impactor; those aerosols with diameter less than 1  $\mu\text{m}$  are allowed to pass it and subsequently pass  
152 through a  $^{85}\text{Kr}$  electric charger to reach a near-Boltzmann distribution of charges (Liu et al., 1985). After  
153 charging, the aerosol particles enter the first differential mobility analyzer (DMA1) at a sheath flow to  
154 aerosol flow ratio of 4:0.3. The sheath flow is circulated by the diaphragm pump in the first loop DMA1  
155 system, and its RH is kept constant at below 5 % RH. The resulting mono-disperse particle population,  
156 selected within uncertainty by the DMA1, is then exposed to high RH conditions during which the aerosol  
157 flow is humidified to 98 % RH by mixing water through a Nafion membrane humidifier at 30 °C. After  
158 passing through a saturator (Perma Pure Inc., USA), the aerosols are dried to a target RH level (RH2)  
159 through a series of two single-Nafion tubes (Perma Pure Inc., USA) with RH2 set to a value in the range  
160 of 90 % to 5 % RH. Here, a pulse width modulator (PWM) circuit is used to regulate the sheath flow on  
161 the basis of a proportional integral derivative (PID) system. When the second Nafion membranes allow  
162 for regulating the sheath flow to a desired RH and for controlled flow into the sample stream until the  
163 RH2 setting value is equal to the excess RH of sheath flow value (RH3), the mobility diameter of the  
164 dehumidified aerosols at target RH are measured with the second DMA (DMA2, a scanning DMA)  
165 coupled with a condensation particle counter CPC (Model 1500, MSP). In addition, the residence time  
166 between the humidifier and DMA2 is around 5 s, which is estimated to be sufficient for aerosols to grow  
167 /shrink to equilibrium size at a certain RH setpoint. Also, due to recirculation of the sheath flow and the  
168 pre-humidification of the aerosol flow, the sheath flow and aerosol sample flow are enabled to rapidly  
169 reach the same RH.

### 170 2.3 Theory and modeling methods

171 Models were applied to explore the extent to which measured hygroscopic diameter growth factors

172 (HGFs), particle phase states, and phase compositions under sub-saturation conditions can be predicted  
173 by thermodynamic equilibrium models. For the AS-containing systems studies, the current  
174 thermodynamic equilibrium predictions account for a crystalline AS phase with solid-liquid equilibria  
175 prior to the complete deliquescence of AS under hydration conditions. Similarly, the crystallization point  
176 followed by a solid-liquid equilibrium of AS needs to be considered to predict the effect of organic  
177 components in the mixed particles on the shift/suppression of AS efflorescence during aerosol  
178 dehumidification, i.e. referring to processes occurring along the dehydration branch of a HTDMA  
179 humidification-dehumidification cycle. The calculation of the ERH of AS in an organic-inorganic  
180 solution is thermodynamically related to the solubility limit, but it is not strictly deterministic (unlike the  
181 DRH) due to the stochastic nature of nucleation-and-growth of a crystal embryo. The molality of pure  
182 AS at saturation in an aqueous solution is known, e.g. measured by Apelblat (1993) at 298.15 K as  
183  $m_{AS}^{(sat)} = 5.790$  mol/kg, while measurements are most often not available for the solubility limit of AS in  
184 aqueous inorganic-organic systems. However, crystalline AS in equilibrium with an aqueous mixture  
185 demonstrates a specific molal ion activity product (IAP) in that solution at a given temperature and  
186 atmospheric pressure. For example, in the case of a ternary liquid mixture of levoglucosan + AS + water  
187 in solid-liquid equilibrium (SLE) with a crystalline AS phase at a certain temperature T, a constant molal  
188 ion activity product  $IAP_{AS} = IAP_{AS}^{(sat)}(T)$  is established (necessary SLE condition). In this case the liquid  
189 mixture is a so-called saturated solution with respect to AS. While the molar amount of AS in a saturated  
190 solution depends on the other mixture constituents, the value of  $IAP_{AS}^{(sat)}(T)$  is a function of temperature  
191 only, since it is derived from the fixed chemical composition and associated chemical potential of the  
192 crystalline phase. A reference value for  $IAP_{AS}^{(sat)}(T)$  can therefore be calculated with the AIOMFAC  
193 model from an experimentally determined solubility limit of AS in a known mixtures, such as the  
194 molality of AS at the point of saturation in the binary aqueous system (water + AS). The RH at which  
195 full dissolution of a solid phase upon humidification is just reached, the DRH, is directly related to the  
196 conditions at which a saturated solution becomes subsaturated upon addition of water. Here the degree  
197 of saturation with AS can be determined unambiguously by the computed value of  $IAP_{AS}$  as a function  
198 of mixture composition and temperature. Making use of these thermodynamic relationships, the  
199 AIOMFAC-based equilibrium model is used to calculate the DRH and ERH of AS in the multicomponent  
200 system, as outlined below. Detailed information on the modeling of solid-liquid equilibria and the IAP-  
201 based prediction of ERH is given in Zuend et al. (2011) and Hodas et al. (2016). Briefly, the ERH is

202 determined based on the following equations:

$$203 \quad \text{IAP}_{\text{AS}} = \left[ a_{\text{NH}_4^+}^{(m)} \right]^2 \left[ a_{\text{SO}_4^{2-}}^{(m)} \right]^1 \quad (1)$$

$$204 \quad \text{IAP}_{\text{AS}}^{[\text{crit}]} = c_{\text{AS}} \times \text{IAP}_{\text{AS}}^{(\text{sat})} \quad (2)$$

205 Here  $a_{\text{NH}_4^+}^{(m)}$  and  $a_{\text{SO}_4^{2-}}^{(m)}$  are the molal activities of the ammonium and sulfate ions in solution (Zuend et  
206 al., 2010). Molality basis is indicated by superscript “(m)” (which is not a mathematical exponent).

207  $\text{IAP}_{\text{AS}}^{(\text{sat})}$  denotes the molal ion activity product of AS at salt saturation computed by the thermodynamic  
208 equilibrium model for any aqueous AS system at a certain temperature (here 298.15 K). The calculated  
209 molal IAP at saturation of the corresponding binary salt solution is taken as the (known) reference value.

210 The RH at which this  $\text{IAP}_{\text{AS}}^{(\text{sat})}$  value is just reached in certain bulk solution at equilibrium with its  
211 environment (in contrast to  $\text{IAP}_{\text{AS}} < \text{IAP}_{\text{AS}}^{(\text{sat})}$  at higher RH), is the (bulk) DRH of AS. Similarly, the ERH

212 is determined at the point of crystallization by a critical IAP value denoted as  $\text{IAP}_{\text{AS}}^{[\text{crit}]}$  (Hodas et al.,

213 2016), the value of  $\text{IAP}_{\text{AS}}^{[\text{crit}]} > \text{IAP}_{\text{AS}}^{(\text{sat})}$  expresses the need for reaching a critical IAP threshold (critical

214 level of AS super-saturation) for highly likely nucleation-and-growth of a new crystalline AS phase. The

215 multiplication factor  $c_{\text{AS}}$  is used as a constant coefficient relating the IAP at AS saturation to the one

216 expected at the point of crystallization in aqueous mixed particles. From the comparison of laboratory

217 measurement of ERH for aqueous AS solution to the AIOMFAC-predicted  $\text{IAP}_{\text{AS}}$  at that RH, the value

218 of  $c_{\text{AS}} \approx 30$  was determined; this value is in particular applicable to submicron-sized AS droplets (Zardini

219 et al., 2008; Ciobannu et al., 2010).

220 An analogous approach is used for the ERH predictions with the E-AIM model, however, since E-AIM

221 provides activity coefficients and activities on mole fraction basis, denoted here by superscript “(x)”

222 (rather than molality basis), the value of  $c_{\text{AS}}^{(x)}$  need to be determined separately for that model.

223 Expressing Eq. (1) by mole-fraction-based activities of  $\text{NH}_4^+$  and  $\text{SO}_4^{2-}$  and comparison to the

224  $\text{IAP}_{\text{AS}}^{(\text{sat},x)}$  and  $\text{IAP}_{\text{AS}}^{(\text{crit},x)}$  computed by E-AIM for AS at the experimental solubility limit and ERH in

225 aqueous AS solutions, a value of  $c_{\text{AS}}^{(x)} \approx 40$  was determined for the calculation with E-AIM.

226 As discussed by Lei et al. (2014), predicting of hygroscopic growth factors with E-AIM includes a

227 sophisticated composition-dependent solution density model, which considers the non-ideality effects on

228 apparent molar volumes used for the calculation of the solution density in mixed organic-inorganic



229 systems (Clegg and Wexler, 2011a, b). The AIOMFAC-based model applies a simpler solution density  
 230 treatment by assuming that the partial molar volumes of solution species are independent of non-ideal  
 231 interactions, i.e. the mixed solution density is calculated based on linear additivity of pure component  
 232 solid or liquid volume contributions to obtain the HGF at a given RH. **Differences in the density models**  
 233 **are expected to lead to relatively small differences, typically on the order of the HTDMA measurement**  
 234 **error or less (e.g. Fig. 2a), in the application to HGF predictions, as demonstrated by Lei et al. (2014) for**  
 235 **the case of diameter vs. mass-based HGF of AS droplets.** Both models include sophisticated sets of  
 236 equations to compute activity coefficients of all solution components in a thermodynamically consistent  
 237 manner.

#### 238 2.4 $\kappa$ -Köhler theory and computation of the hygroscopicity parameter $\kappa$

239 The hygroscopicity parameter,  $\kappa$ , is commonly used to characterize the relative hygroscopicities of  
 240 individual aerosol particles, known mixtures or complicated atmospheric aerosols (Petters and  
 241 Kreidenweis, 2007), and to model the composition-dependence of the solution water activity. The  
 242 saturation ratio,  $S$ , in the traditional Köhler equation (Eq. 3), over an aqueous droplet is calculated from

$$243 \quad S = a_w \left( \frac{4\sigma_s M_w}{RT \rho_w D_{wet}} \right) \quad (3)$$

244 Where  $a_w$  is the mole-fraction-based water activity in solution,  $M_w$  and  $\rho_w$  are the molar mass of water  
 245 and the density of pure water in the liquid state at temperature  $T$ , respectively.  $D_{wet}$ , the “wet” particle  
 246 diameter at a given RH, is defined by  $D_{wet} = HGF \times D_0$ .  $D_0$  denotes the diameter at dry conditions at  
 247 RH below 5 %. The solution surface tension is denoted by  $\sigma_s$ . In the “ $\kappa$ -Köhler theory”, the bulk solution  
 248 water activity is described by a single parameter  $\kappa$ , with the hygroscopic parameter of the overall mixture  
 249 related to Eq. (3) by

$$250 \quad \kappa_{HGF} = 1 - HGF^3 + \frac{HGF^3 - 1}{S} \exp \left[ \frac{4\sigma M_w}{RT \rho_w D_{wet}} \right] \quad (4)$$

251 This expression describes effective values of  $\kappa_{HGF}$  as a function of droplet diameter and  $HGF$  at a  
 252 certain saturation ratio. In turn, known (measured) solution  $\kappa_{HGF}$  values or component-specific  $\kappa_i$   
 253 values can be used to parameterize or predict the  $HGF$  curve of a mixture (Petters and Kreidenweis,  
 254 2007).

## 255 2.5 GF data fit

256 As described by Dick et al. (2001), the relationship between measured hygroscopic growth factors and  
257 water activity can alternatively be parameterized by the following expression:

$$258 \quad HGF = \left[ 1 + (c_1 + c_2 \times a_w + c_3 \times a_w^2) \frac{a_w}{1-a_w} \right]^{\frac{1}{3}} \quad (5)$$

259 By substitution of Eq. (3) for  $a_w$  in Eq. (5) and a fit to the measured HGF the three adjustable coefficients  
260  $c_1$ ,  $c_2$ ,  $c_3$  of Eq. (5) were determined. The coefficient values are given in Table 3 for the different  
261 organic compounds considered.

## 262 2.6 GF prediction by ZSR

263 The Zdanovskii-Stokes-Robinson mixing rule is widely used to approximate the water uptake of mixed  
264 systems by assuming additivity of the water uptake of each individual component in the mixed particles  
265 at a given RH (e.g., Malm and Kreidenweis, 1997).  $HGF_{mix}$  is based on the  $HGF_j$  of pure components  $j$   
266 and their corresponding volume fraction,  $\varepsilon_j$  in the mixed particles.

$$267 \quad HGF_{mix} = \left[ \sum_j \varepsilon_j (HGF_j)^3 \right]^{\frac{1}{3}} \quad (6)$$

268

## 269 3. Results and discussion

### 270 3.1 GF of single compounds systems

271 Figure 2a shows the measured diameter growth factors of AS particles as a function of RH for both  
272 humidification and dehumidification conditions. The measured ERH of 100 nm AS particles is  
273 approximately 35 % RH at 298.15 K. The models predicted GF and predicted solid-liquid phase transition  
274 of AS are in relatively good agreement with the experimental data and, in particular, the efflorescence  
275 (crystallization) of AS is captured by the AIOMFAC and E-AIM models. The good model-measurement  
276 agreement for the ERH is of course expected, since the aqueous AS system serves as the reference system  
277 for determining the value pairs of  $IAP_{AS}^{(sat)}$  and  $c_{AS}$  on molality and mole fraction basis for use with  
278 AIOMFAC and E-AIM, respectively (section 2.3). An ERH of 31 % to 40 % RH was reported by other  
279 groups for a range of particle sizes and experimental techniques (Zardini et al., 2008; Ciobanu et al.,

280 2010). There are several factors that contributed to the variability of reported ERH values, such as  
281 particles size, temperature, solution impurities and the stochastic nature of the homogeneous or  
282 heterogeneous nucleation of a crystalline phase near ERH (Ciobanu et al., 2010).

283 In Fig. 2b, upon dehydration, no efflorescence of the levoglucosan aerosol particles is observed even  
284 at RH below 10 %. The agreement of the HGF between the hydration and dehydration processes  
285 demonstrates that these particles equilibrate with the surrounding water vapor under these moisture  
286 conditions. For example, the measured diameter growth factors of levoglucosan particles at 80, 60, and  
287 30 % RH are 1.19, 1.09, and 1.03, respectively, which are similar to results obtained for the hydration  
288 process of such particles. Levoglucosan has a DRH of ~80 % to 83 % (for a bulk system) at 293 to 298 K  
289 (Mochida and Kawamura, 2004; Zamora et al., 2011). **The similarity of diameter growth factors both**  
290 **under hydration and dehydration conditions even below the DRH of levoglucosan is explained by the**  
291 **lack of crystallization of levoglucosan upon drying to low RH and the presence of a metastable**  
292 **supersaturated aqueous levoglucosan solution in both the hydration and dehydration modes for**  
293 **experiments initiated with liquid solution droplets (Mochida and Kawamura, 2004; Chan et al., 2005;**  
294 **Svenningsson et al., 2006). A possible reason for a persistent metastable supersaturated solution states is**  
295 **that levoglucosan particles remain liquid (possibly a viscous liquid state) upon drying to below 5 % RH,**  
296 **which was also observed previously with a reported ERH < 4% RH (Mochida and Kawamura, 2004;**  
297 **Chan et al., 2005). Also, the measured diameter growth factors of levoglucosan particles are in good**  
298 agreement with these estimated from the standard UNIFAC model within the E-AIM model and the  
299 AIOMFAC model, within experimental uncertainty. **The UNIFAC models within E-AIM and AIOMFAC**  
300 **are based on the original model expressions by Fredenslund et al. (1975) and both include the extensive**  
301 **parameter set by Hansen et al. (1991) as well as revised parameters for certain group interactions of water**  
302 **with carboxyl and hydroxyl groups by Peng et al. (2001). Of relevance for levoglucosan and other sugar-**  
303 **like compounds, the AIOMFAC model also contains certain revised group parameters for hydroxyl**  
304 **groups and special alkyl groups for their interactions with water, introduced by Marcolli and Peter (2005)**  
305 **for polyols, as further detailed in Zuend et al. (2011). However, the molecular structure of levoglucosan**  
306 with several polar functional groups in close vicinity may account for a small deviation between models  
307 and measured *HGFs* at RH below 70 %, because intramolecular interactions are not fully considered by  
308 these models.

309 The measured diameter growth factors of 4-hydroxybenzoic acid particles shown in Fig. 2c  
310 demonstrate untypical increase in diameter of 4-hydroxybenzoic acid particles during dehumidification  
311 from 90 to 10 % RH, which is consistent with previous diameter growth factor for a few solid particles  
312 (Mochida and Kawamura, 2004). The organic particles measured are likely always in the effloresced, i.e.  
313 crystalline state apparently even at high RH. The apparent increase in diameter during dehumidification  
314 may be explained by particle shape restructuring, since the (poly)-crystalline particles are likely non-  
315 spherical at dry conditions, but may become more sphere-like in shape when exposed to higher RH  
316 (Mikhailov et al., 2004). Also, no ERH of 4-hydroxybenzoic acid in the dehydration mode was observed  
317 during the experiments; the likely reason is that the highest RH reached in the humidifier was  
318 approximately 98 %, which may be below the ERH of 4-hydroxybenzoic acid, reported as above 98 %  
319 RH in another study (Mochida and Kawamura, 2004). As discussed previously by Lei et al. (2014), our  
320 HTDMA experiments are carried out such that RH = 98 % is reached initially before dehumidification  
321 to a series of relative humidities at set point RH2 (90 % – 5 % RH), the crystallization of the organic,  
322 however, could occur at above 90 % RH. In addition, deviations between measurements and model  
323 prediction are obvious in Fig. 2c. The observations surpass by far the expected error in model  
324 performance, which is typically less than 0.05 in HGF units for RH < 85 %, as indicated also by an  
325 intercomparison of the AIOMFAC and E-AIM predictions in Fig. 2c and much improved model-  
326 measurement agreement for the case of mixed 4-hydroxybenzoic acid + AS particles shown in Fig. 4  
327 (discussed in Section 3. 2. 2). However, note that the validity of the shown model predictions in Fig. 2c  
328 depends on whether the assumption of a liquid solution droplet is plausible. Therefore, it is no surprise  
329 that the model-predicted curves deviate from the experimental hygroscopic behavior of 4-  
330 hydroxybenzoic acid particles. Morphology effects, such as the restructuring of non-spherical  
331 polycrystalline particles over a certain RH range or liquid-liquid phase-separated particles of non-  
332 spherical shapes, have been discussed by several groups (Sjogren et al., 2007; Reid et al., 2011; Lei et  
333 al., 2014). In the case of hygroscopic growth and deliquescence under hydration conditions for 4-  
334 hydroxybenzoic acid particles and mixtures of 4-hydroxybenzoic acid with ammonium sulfate. An offset  
335 between measurement and model predictions was observed both in the RH range below the deliquescence  
336 of the particles and above it, i.e. above 80 % RH, (Lei et al., 2014). It is suggested that deviations are  
337 primarily caused by a change in solid-state particle morphology during hydration, leading to a  
338 restructuring of the polycrystalline particle shape towards more compact, near-spherical shape as the RH

339 approaches the particle deliquescence point. This would explain rather uncommon HGF values of less  
340 than 1.0 at elevated RH also shown in Fig. 2c. Similar behavior was found for experimental growth  
341 factors of mixtures containing adipic acid and AS and systematic deviations between the associated ZSR  
342 predictions and observations by Sjogren et al. (2007). Thus, while experimental data hint to the possible  
343 influence of non-spherical particles and their humidity-induced restructuring as a source of uncertainty,  
344 model predictions of HGF, such as those with the AIOMFAC model, assume by default a spherical  
345 particle shape even for solid phases and/or in cases where LLPS is present.

346 The measured HGF curves of humic acid aerosol particles during dehumidification and humidification  
347 measurements do not agree very well within experimental uncertainty, in particular above 70 % RH. For  
348 instance, the growth factor of humic acid aerosol particles at 80 % RH is 1.2 according to the  
349 dehumidification measurement, which is higher than hygroscopic growth factor of humic acid particles  
350 in the humidification mode at the same RH. Humic acid aerosol particles shrink continuously due to loss  
351 of water content in the range from 90 % to 10 % RH. For example, a stepwise change in the water  
352 absorption and desorption behavior within different RH range was observed in the case of Nordic Aquatic  
353 Fulvic Acid (NAFA) and Suwannee River Fulvic Acid (SRFA) by Chan and Chan (2005). These  
354 hygroscopic behaviors suggest that humic acid particles and structurally similar compounds remain some  
355 water down to the low RH levels achieved in the instruments (imperfect drying during particle residence  
356 in the instrument). In addition, the experimental growth factor of humic acid aerosol particles during  
357 dehumidification can be represented well by fitting Eq. (5) to the measurements. The determined fit  
358 parameters are listed in Table 3. The humic acid sample used (Aldrich, 99%) are a mixture of different  
359 poly-carboxylic acids of undefined chemical structure. However, specific information on the chemical  
360 structure and mixture composition is necessary for corresponding model predictions with AIOMFAC and  
361 E-AIM. Therefore, no such model calculations are shown in Fig. 2d.

### 362 **3.2 GF of mixtures of organic surrogate compounds + ammonium sulfate**

363 Biomass burning aerosol particles are likely mixtures of a diversity of inorganic constituents and organic  
364 compounds in the atmosphere. For example, particles may consist of a combination of ammonium sulfate  
365 mixed with low- and semi-volatile organics from biomass burning emissions (Lee et al., 2003; Zhang et  
366 al., 2007; Pratt and Prather, 2010). Different water solubilities, and hygroscopic behavior of distinct

367 organic compounds may affect the hygroscopic growth factors of mixtures of partially or fully dissolved  
368 inorganic and organic components. For example, Bodsworth et al. (2010) studied the effect of different  
369 mass fractions of citric acid on the efflorescence properties of mixed citric acid-ammonium sulfate  
370 particles at lower temperature and concluded that adding citric acid decreases the ERH of ammonium  
371 sulfate in the mixed aerosol particles. These hygroscopic behaviors of mixed aerosol particles, including  
372 phase transition in the range from moderate to low RH, are the focus of attention in this study.

### 373 **3.2.1 Mixed system: levoglucosan + ammonium sulfate**

374 Figure 3 shows measured growth factors of mixed aerosol particles containing levoglucosan +  
375 ammonium sulfate with different dry state organic-to-inorganic mass ratios (1:3, 1:1, 3:1) in the RH range  
376 from 90 % to 10 %. There is a reduction in the diameter growth factor of aerosol particles containing  
377 levoglucosan and AS with increasing levoglucosan mass fraction, as expected from a ZSR-like additivity  
378 concept of hygroscopicity. When the concentration of levoglucosan is low (25 wt %), a clear  
379 efflorescence of AS can be found but shift to a higher RH (40 % - 45 %) than the ERH of pure AS (Fig.3a).  
380 Similar phenomenon has been also found for the mixed system of NaCl and Nordic Aquatic Fulvic Acid  
381 (NAFA) that the crystallization of NaCl shifted to higher RH by mixing with NAFA at a mass ratio of  
382 1:1 (Chan and Chan, 2003). With increasing mass fraction of levoglucosan (i.e., 50 wt % and 75 wt %),  
383 the mixtures release water gradually, no crystallization of AS was observed. Although a small step of  
384 crystallization of AS may still happen, it can not be detected by our system. The rather high viscosity of  
385 solutions containing levoglucosan is expected to increase considerably toward RH (Marshall et al., 2016).  
386 This increase in viscosity might impede the crystallization of AS in the mixed systems on the time scale  
387 of the experiment. Mass transfer limitation effects on the deliquescence or efflorescence process of  
388 crystalline organic particles and the water uptake or evaporation have been investigated in several  
389 experimental studies (Peng et al., 2001; Choi and Chan, 2002; Chan and Chan, 2005; Sjogren et al., 2007;  
390 Zardini et al., 2008; Ciobanu et al., 2010; Smith et al., 2012; Mikhailov et al., 2013; Hodas et al., 2015).  
391 Mass transfer limitations may impact the outcome of experiments significantly if the characteristic time  
392 scales for equilibration is similar to or larger than the residence time of particles in the experimental  
393 setup. In this study, the total residence time of the aerosol sample during the equilibration phase before  
394 entering the DMA2 is about 8 s. In order to improve the probability that the particles reach equilibrium  
395 with the target RH during this residence time, the monodisperse aerosol selected by DMA1 is first

396 humidified to 98 % RH. The aerosol particles are then exposed to a lower target RH by a two-step process  
397 using double Nafion tubes. Kerminen (1997) estimated the necessary residence time for achievement of  
398 water equilibrium of aqueous droplets to be between  $8 \times 10^{-6}$  s and 0.1 s for 100 nm and 500 nm particles,  
399 respectively. Therefore, the typical residence time of a few seconds in the humidification or  
400 dehumidification section in a HTDMA measurement is assumed to be sufficient for most equilibrium  
401 hygroscopicity measurements (Brooks et al., 2004; Mikhailov et al., 2004). Moreover, our HGF results  
402 for the three pure organic components are in good agreement with respective data by Mochida and  
403 Kawamura, (2004), Brooks et al., (2004) and Chan and Chan (2005) conducted with different techniques  
404 and/or residence times. However, there are cases where water equilibration could be impeded  
405 substantially in the presence of highly viscous or glassy particles at low RH, e.g. for ternary sucrose +  
406 NaCl + water particles of  $> 6 \mu\text{m}$  in diameter studied by Bones et al. (2012), who report an equilibration  
407 time scale  $> 1000$  s for such particles. Note that, aside from viscosity, there is an important size-  
408 dependence of the particles on the equilibration time scale (e.g. Koop et al. 2011). For aqueous 100 nm  
409 particles used in HTDMA experiments at room temperature, Bones et al. (2012) indicate that the  
410 equilibration time scale for water is likely only of concern for  $\text{RH} < 10\%$  in such an instrument. We  
411 therefore conclude that the residence time of 8 s is very likely sufficient to allow for equilibrium HGF  
412 measurements in dehydration mode, at least down to 10 % RH (when starting with aqueous solution  
413 droplets).

414 Mass transfer effects in hygroscopicity measurements of aerosol particles during hydration conditions  
415 have been encountered previously, particularly when a solid-liquid phase transition (deliquescence) is  
416 involved (Peng et al., 2001; Chan and Chan, 2005; Sjogren et al., 2006). For example, Peng et al. (2001)  
417 observed in electrodynamic balance (EDB) experiments under conditions of very slow humidification  
418 that glutaric acid aerosol particles showed a deliquescence phase transition in the RH range from 83 to  
419 85 % over the course of several hours. This is a much longer time span than that of  $\sim 40$  min for the  
420 deliquescence of other super-micron sized dicarboxylic acid particles (e.g., malonic acid) in EDB  
421 experiments. This observation indicates that the solid-liquid phase transition of glutaric acid particles  
422 may likely be mass transfer limited during the hydration process. In this context, it is possible that the  
423 deliquescence of initially solid, pure 4-hydroxybenzoic acid particles at  $\text{RH} > 97\%$  is further impeded  
424 by slow dissolution, which could have led to the absence of deliquesced particles (Fig. 2c) on

425 experimental time scale.

426 In addition, the measured diameter growth factors of mixtures of levoglucosan and AS are compared  
427 to calculations of hygroscopic growth by the E-AIM and AIOMFAC models. The E-AIM prediction is  
428 in relatively good agreement with results from the HTDMA measurement but typically overestimates the  
429 water content of particles consisting of organic-AS mixtures at the RH range close to the ERH of AS.

430 The liquid-solid phase transition of ammonium sulfate in the mixed particles is considered in the E-AIM  
431 assumptions as described in Section 2.3. There is a more distinct shift of ERH of AS with higher mass  
432 fractions of levoglucosan. In the case of the AIOMFAC and E-AIM model predictions, it is assumed that  
433 the diameter growth factor contribution from AS is zero below the predicted ERH, i.e. there the growth  
434 factor deviation from 1.0 is solely due to the organic water uptake. The model prediction shows a slight  
435 deviation from the measurements, which may be in part due to (i) model uncertainty in the correct  
436 description of the hygroscopicity of levoglucosan, (ii) due to incomplete representation of AS +  
437 levoglucosan interactions in aqueous solutions and (iii) in part due to measurement error. Also, in the  
438 case of mixtures consisting of AS and levoglucosan with organic-to-inorganic dry mass ratio of 3:1 (75  
439 wt % levoglucosan of dry particle composition), the underestimation of the growth factor by the  
440 AIOMFAC model at  $RH < 35\%$  in comparison to the measurements is explained in part by the model  
441 prediction of AS efflorescence (which seems to be absent in the measurements). However, with  
442 decreasing AS mass fraction, the hygroscopic behavior of levoglucosan dominates the diameter growth  
443 factors of the mixtures, in relative agreement with the AIOMFAC-modeled “dehydration branch”  
444 prediction. Minor differences in the AIOMFAC prediction vs. -measurement for diameter growth factors  
445 of mixed levoglucosan and AS in the RH range of 35 - 25 % here might be attributed to mixture viscosity  
446 effects at the higher levoglucosan contents, which may suppress the efflorescence of AS in the mixed  
447 systems on experimental timescale or it could simply be due to sufficient miscibility of dissolved AS in  
448 the aqueous levoglucosan solution (beyond that predicted by the model), such that a small step-change  
449 due to AS efflorescence could be beyond the experimental detection range. As a result, accounting for  
450 the effect of the organic components on the diameter growth factors of mixtures within aerosol particles  
451 is crucial to model accurately the equilibrium hygroscopic behavior.

452 **3.2.2 Mixed system: 4-hydroxybenzoic acid + ammonium sulfate**



453 Mixtures of 4-hydroxybenzoic acid + AS with different organic mass fraction (25, 50, 75 wt %) exhibit  
454 a gradual water desorption before the AS fraction of the particle effloresces at a certain RH. With  
455 increasing 4-hydroxybenzoic acid mass fraction, no discontinuity step at the corresponding ERH in the  
456 dehydration curve of mixtures is observed. This suggests the presence of 4-hydroxybenzoic acid in the  
457 liquid state retards or offsets the efflorescence of AS in the mixtures. An interesting, yet contrasting  
458 phenomenon was observed for the hydration process of aerosol mixtures containing 4-hydroxybenzoic  
459 acid and AS by Lei et al. (2014). For the case of these mixtures during moistening, the deliquescence of  
460 ammonium sulfate in the mixed particles remains unaffected, within experimental resolution, by the  
461 presence of 4-hydroxybenzoic acid (Lei et al., 2014). Similar behavior has been observed for particles  
462 containing certain organic acids of limited water-solubility mixed ammonium sulfate (Choi and Chan,  
463 2002; Chan and Chan, 2003). For example, mixtures for succinic acid + ammonium sulfate showed no  
464 substantial influence on the deliquescence RH of ammonium sulfate in the hydration process (Choi and  
465 Chan, 2002). However, a clear RH shift of the deliquescence phase transition of ammonium sulfate or  
466 sodium chloride was determined for mixed particles containing organic acids of higher water-solubility  
467 and O: C ratio, such as citric acid and malonic acid (e.g. Choi and Chan, 2002). The DRH and ERH of  
468 pure organics and AS in the mixed organic-AS particles are summarized in Table 4, the measurements  
469 indicate that 4-hydroxybenzoic acid has a significant effect on the efflorescence of AS when present in  
470 sufficient amount. Also, there is a clear reduction in the diameter growth factors prior to crystallization  
471 for mixtures with increasing 4-hydroxybenzoic acid mass fraction.

472 The measurements of mixtures consisting of 4-hydroxybenzoic acid and AS are compared with model  
473 predictions based on different assumptions about the phase state of the organic component, since the  
474 deviation from measurements might partly be explained by a transition in the physical state of the organic  
475 component. The E-AIM model prediction is referring to a system where the mixtures of 4-  
476 hydroxybenzoic acid is assumed to be in the liquid state at all RH levels, which the efflorescence of AS  
477 is considered. Neglecting the potential efflorescence of the organic component in the dehydration branch  
478 makes a systematic offset more obvious prior to the efflorescence of AS. A good E-AIM model-  
479 measurement agreement occurs below the predicted ERH of AS for mixed particles. The overestimation  
480 of HGFs before the efflorescence of AS is explained by the AIOMFAC model prediction with distinct  
481 assumptions about the organic phase state. A possible reason for the departure of model-measurement

482 agreement at  $RH < 80\%$  is that there are two liquid-to-solid phase transitions, occurring in the mixed  
483 particles: a gradual one for the organic component and a step-like one for AS at lower RH. This  
484 phenomenon is shown in the grid square range in Fig. 4 and supported by comparison of the measured  
485 HGF data with AIOMFAC-based predictions for two assumptions about the organic phase state,  
486 especially in the case of mixtures with 50 and 75 wt-% organic. We acknowledge that the model  
487 predictions of the HGF curves for the two organic phase state assumptions differ within experimental  
488 error for the case shown in Fig. 4a, indicating that alternative explanations, such as model/measurement  
489 uncertainty in the absence of a liquid-solid phase transition could explain the observations. In the Fig.  
490 4b, good agreement between measurements and the AIOMFAC model prediction with liquid organic  
491 assumption is found for  $RH > 65\%$ , while for  $RH \leq 60\%$  the experimental data agree very well with the  
492 dashed red model curve for the case with consideration of a solid organic component. It suggests that  
493 crystallization followed by gradually increasing partitioning of organic from the solution to the solid  
494 organic phase occurs in the range from 70 % to 60 % RH under conditions of dehumidification. Similarly,  
495 a liquid-to-solid phase transition occurs for the organic: AS mass ratio of 3:1 cases in the range from 80 %  
496 to 50 % RH. Meanwhile, AS remains dissolved in a supersaturated aqueous solution phase. Moreover,  
497 the AIOMFAC-based equilibrium model predicts a liquid-liquid phase separation (LLPS) to occur at RH  
498 below  $\sim 90\%$  for the calculation cases with the assumption of the organic in the liquid state (for all three  
499 organic mass fractions in Fig. 4). This prediction leads to a liquid phase enriched in 4-hydroxybenzoic  
500 acid with some water and AS dissolved and a coexisting liquid phase enriched in AS and water. The onset  
501 of the LLPS during dehumidification leads to the kink in the red model curve near 90 % RH, since the  
502 slope of the HGF curve with RH changes in a non-smooth manner at the point of the LLPS phase  
503 transition. This change in slope is not noticeable from the experimental data alone, but the model-  
504 measurement comparison for the range above 80 % RH shows very good agreement. The two liquid  
505 phases will likely remain separated until nucleation of a crystalline 4-hydroxybenzoic acid phase occurs  
506 followed by gradual partitioning of the organic acid to the solid phase with decreasing RH (to  $\sim 50\%$   
507 RH), at which point only a single liquid phase (an aqueous AS phase with a tiny amount of dissolved  
508 HA) will remain until efflorescence of AS occurs. Above  $\sim 90\%$  RH, a single, homogeneous liquid phase  
509 is predicted to exist. Interestingly, this AIOMFAC model-measurement comparison (Fig. 4, especially  
510 panels b and c) provides reasonable evidence that 4-hydroxybenzoic acid remains dissolved and therefore  
511 in a liquid phase state at high RH in the mixed particles upon dehumidification (it is present in both liquid

512 phases below 90 % RH, but highly enriched in the AS-poor phase). In contrast, in the case of pure 4-  
513 hydroxybenzoic acid aerosol particles, particles exposed to initial RH of  $\geq 90$  % remain in the solid state  
514 ( or crystallize at RH  $> 90$  %) in the dehydration mode (Fig. 2c). What factors contribute to keeping the  
515 organic in the liquid solution? It is possible that the aerosols generated with those mixed solutions were  
516 allowing the 4-hydroxybenzoic acid to fully dissolve as the AS provides substantial particle phase water  
517 content (within short time) into which the organic can be dissolved and may then further contribute to  
518 water uptake associated with the organic's hygroscopicity (unlike in the case of the pure 4-  
519 hydroxybenzoic acid particles). The 4-hydroxybenzoic acid remains dissolved in the mixture, possibly  
520 supersaturated with respect to the crystalline organic state (similarly to how AS stays supersaturated at  
521 RH below the DRH during drying). We consider this a reasonable explanation for the observed HGF data  
522 from the HTDMA in comparison to the different AIOMFAC-based curves.

### 523 **3.2.3 Mixed system: humic acid + ammonium sulfate**

524 Figure 5 shows that the experimental diameter growth factors of mixtures consisting of humic acid (HA)  
525 and AS with dry mass ratios of 1:3, 1:1 or 3:1 decreases with increasing mass fraction of HA at RH  $>$   
526 35 %. For example, at 35 % RH the measured HGF are 1.1, 1.05, 1.05 for the particles consisting of 25  
527 wt %, 50 wt % and 75 wt % humic acid. In comparison, the diameter growth factor of pure supersaturated  
528 AS particles is  $\sim 1.13$  just prior to efflorescence of AS. Humic acid, unlike levoglucosan and 4-  
529 hydroxybenzoic acid aerosol particles, has no noticeable effect on the efflorescence point of AS in the  
530 mixed aerosol particles. Results of the ZSR model agrees well with measured hygroscopic growth for  
531 mixtures within the experimental error. The ZSR curves shown in Fig. 5 are based on the RH-dependent  
532 fitted hygroscopic growth factors of humic acid with Eq. (5) and the AIOMFAC predicted diameter  
533 growth factors of AS in the dehydration mode. The success of the ZSR mixing rule for this system  
534 suggests that interactions of organic molecules with ammonium sulfate ions in aqueous solution will only  
535 marginally affect the hygroscopic growth factors of the mixtures containing humic acid and AS. Due to  
536 the lack of detailed information about the actual chemical structures of humic acid samples used, it was  
537 not possible to perform E-AIM and AIOMFAC model predictions for comparison with the measurement.

### 538 **3.3 Mixtures of biomass burning organic surrogate components with ammonium sulfate**

539 According to Decesari et al, (2006), sampling of aerosol particles, including the WSOC fraction, was

540 conducted from September 9 to November 14, 2002 in their field study, the sampling time was subdivided  
541 into different periods. Despite of significant changes in the chemical composition of tracer compounds  
542 from the dry to the wet period, the functional groups and general chemical classes of WSOC changed  
543 only to a small extent in the Amazon basin near Rondônia, Brazil. Model compounds represent semi-  
544 quantitatively (presence/abundance of functional groups) and the chemical structure of WSOC can be  
545 used as surrogates in microphysical models involving organic aerosol particles over tropical areas  
546 affected by biomass burning scenarios (Andreae et al., 2002; Artaxo et al., 2002; Rissler et al., 2006;  
547 Decesari et al., 2006). Here, we focus on experimental observations and model calculations for relatively  
548 simple mixtures of inorganic-organic surrogate components reflecting mixtures of aerosol components  
549 found during different seasons during biomass burning events. However, we are fully aware of that fact  
550 that actual biomass burning aerosols are typically much more complex in terms of particle chemical  
551 composition. Aerosol particle properties from biomass burning events depend on the types of sources,  
552 external/internal population mixing state, water-solubilities, and phase state of the diversity of organic  
553 compounds and their mixing with inorganic constituents during different time periods in the field (e.g.  
554 Decesari et al., 2006).

### 555 **3.3.1 Mixtures system: mix-bio-dry and mix-bio-wet aerosol particles**

556 Figure 6a shows the observed small differences in the hygroscopicity parameter  $\kappa$  for mixtures of organic  
557 surrogate components and ammonium sulfate representing biomass burning particles during the dry and  
558 wet periods in the Amazon, respectively. Hygroscopicity parameter values for bio-mix-dry aerosol  
559 particles were determined to be between 0.16 and 0.18 with decreasing RH in the range from 90 % to  
560 40 % RH. The  $\kappa$  value representing the wet period in the Amazon is shown in Fig. 6b, derived from  
561 laboratory HTDMA measurements in the range from 90 % to 40 % RH. A similar trend of an increase in  
562  $\kappa$  with a decrease in RH has also been observed by Cheung et al. (2015). Their observation is based on  
563 ambient particle measurement with a HTDMA in Hong Kong, therefore probing particles of more  
564 complex compositions in the field campaign. The variability of the hygroscopicity parameter in sub-  
565 saturated conditions reveals some limitations of a single-parameter hygroscopicity model for applications  
566 over a wide range of RH. At low, intermediate and high RH levels, differing degrees of solution non-  
567 ideality, potential for liquid-liquid phase separation, water-solubility limitations of organics in ambient  
568 organic-inorganic particles, and assumptions about constant/variable surface tension may all play a role

569 (Mikhailov et al., 2009; Wex et al., 2009, Rastak et al., 2017; Ovadnevaite et al. 2017; Wang et al., 2017).  
570 In the case of  $\kappa$  of organic surrogates mixed with ammonium sulfate, the relevant  $\kappa$  value range is  $\sim 0.12$   
571 to 0.15 obtained from 90 % to 40 % RH. The measured  $\kappa$  values of the mixtures are compared to field  
572 data of HTDMA and CCN measurements conducted at a remote rainforest site in the central Amazon  
573 during the dry and wet seasons (Whitehead et al., 2016; Pöhlker et al., 2016), which are consistent with  
574  $\kappa$  obtained at similar field sites (within the uncertainty of experiments). The likely reason for a relatively  
575 good agreement between the hygroscopicity of the laboratory mixtures and the field data is that the  
576 organic mass fractions of the mix-bio-dry and mix-bio-wet mixtures are chosen in our laboratory  
577 experiments to be similar to those of the latest field data from Amazon. For example, Pöhlker et al. (2016)  
578 obtained the effective hygroscopicity parameters  $\kappa$  between  $0.3 \pm 0.01$  and  $0.15 \pm 0.01$  based on the  
579 organic mass fraction range from 0.65 to 0.97 in the dry season by aerosol chemical speciation monitor  
580 (ACSM) and CCN measurements. The predicted  $\kappa$  values of the mixtures at various RH levels shown in  
581 Fig. 6 (black curves) are obtained by application of Eq. (4) with use of the RH-dependent fitted HGFs of  
582 the organic surrogates (Eq. 5), the predicted growth factor of AS by the AIOMFAC model (for the  
583 humidification case) and the volume fraction based mixing rule for a mixture's HGF (Eq. 6). For these  
584 calculations, a solution surface tension of  $0.072 \text{ J m}^{-2}$  was assumed. These predictions agree relatively  
585 well with the experimental  $\kappa_{dry}$  and  $\kappa_{wet}$  values obtained from the HTDMA over a wide range in RH  
586 referring to dehumidification conditions (no solid AS). Furthermore, the combined approach of Eqs. (4-  
587 6) allows for a prediction of the change in  $\kappa$  at high RH towards water vapor super-saturation. A small  
588 difference in  $\kappa$  between sub- and super-saturated conditions is observed for our mixed systems when  
589 comparing the HTDMA data and predictions at 90 % RH with the predictions near 100 % RH and the  $\kappa$   
590 values from the CNN field measurements. The difference is more pronounced for the wet season case.  
591 Rastak et al. (2017) observed a marked difference in apparent hygroscopicity and related mixture  $\kappa$  of  
592 the organic aerosols (AS-free) occurring in the case of monoterpene-derived secondary organic aerosol  
593 (SOA) for sub- vs. super-saturated conditions. A smaller difference was reported for the isoprene-derived  
594 SOA (Pajunoja et al., 2015; Rastak et al., 2017), more like the difference observed here for the mixtures  
595 containing AS (and therefore having overall higher  $\kappa$  values than typical salt-free organic aerosols).  
596 Rastak et al. (2017) attribute the distinct difference in  $\kappa_{SOA}$  of the monoterpene SOA to the limited mutual  
597 solubility of certain SOA components in water, because a single liquid organic-phase of monoterpene  
598 oxidation products is present at RH below 95 %, but over a RH range above 95 %, liquid-liquid phase

599 separation is observed by optical microscopy as well as predicted by the AIOMFAC-based equilibrium  
600 model. In the mix-bio-wet and mix-bio-dry cases shown in Fig. 6, the likely reason for the change in  
601 characteristic mixture hygroscopicity is not necessarily due to a liquid-liquid phase separation at high  
602 RH. For example, the  $\kappa$  parameter obtained from field data is  $\sim 0.15 \pm 0.06$  at 90 % RH, while its value  
603 reaches  $\sim 0.18 \pm 0.04$  at RH > 100 % (just prior to CCN activation). A likely reason for the difference is  
604 that hygroscopic particles, especially those containing sparingly soluble organics like 4-hydroxybenzoic  
605 acid, take up water dramatically above 95 % RH when approaching 100 % RH (Huff Hartz et al., 2006;  
606 Chan et al., 2008; Rastak et al., 2017), which is clear from model predictions, as demonstrated in Fig. 6  
607 by application of Eq. (4). The predicted curve in the mixture's effective  $\kappa$  parameter may well capture  
608 the change in hygroscopicity under such high RH conditions. Consequently, for a precise representation  
609 of the hygroscopic growth behavior (e.g. HGF) at high RH (> 95 %) by the  $\kappa$ -Köhler model, the value of  
610  $\kappa$  would need to be varied. While a variable  $\kappa$  value is contrary to the attempted simplicity of the single-  
611 parameter  $\kappa$ -Köhler model, it is at least advised to consider that  $\kappa$  values derived from HGF data at 80 %  
612 or 90 % RH may not apply accurately for the calculation of CCN activation properties of such biomass  
613 burning aerosols.

614 To summarize, there is small difference in hygroscopicity parameters between sub-saturated  
615 measurement conditions at 90 % RH in the laboratory with HTDMA and supersaturated conditions using  
616 CCN measurements, in agreement with the findings of other studies. At regional scale, in the dry and wet  
617 period, the hygroscopic behavior in some extent of the Amazon rainforest is influenced significantly by  
618 the biomass burning emissions, which enhances CCN activity and droplet number concentrations in  
619 warm clouds in that region and influences the radiation balance and cloud life time (Pöschl et al., 2010).  
620 Underestimation of organic surrogate component mass fractions in the mixed particles or organic:sulfate  
621 mass ratios may be responsible for the slight differences in the determined  $\kappa$  parameters of the laboratory  
622 and field measurements.

623

#### 624 **4. Conclusions**

625 A number of field-based hygroscopicity studies about biomass burning aerosol focus on the growth  
626 factors of mixtures at high RH (e.g. 90 % RH). However, less attention has been paid to the growth

627 behavior at low to moderate RH, limiting the database for accurate estimates of particles optical and  
628 radiative properties over those lower RH ranges. However, this is a RH range in which water uptake or  
629 release behavior demonstrates a considerable variability among different organic-inorganic systems. The  
630 occurrence or suppression of a liquid-solid phase transition affects the physicochemical particle  
631 properties in a relative narrow RH range, potentially leading to particles of different morphology and  
632 physical states, affecting effective particle size and density. In this work, measurements and  
633 thermodynamic equilibrium predictions for organic-inorganic aerosols related to components from  
634 biomass burning emissions demonstrate a diversity of hygroscopic growth/shrinking behavior. For  
635 example, in the case of aerosol mixtures containing levoglucosan and ammonium sulfate, the presence  
636 of levoglucosan may cause the efflorescence of AS to occur at higher RH than in pure aqueous AS  
637 particles-or it may completely suppress AS efflorescence, as observed for mixtures with a high  
638 levoglucosan mass fraction. The growth curves predicted with an AIOMFAC-based thermodynamic  
639 equilibrium model reproduce the observations in most cases reasonably well and we demonstrate the  
640 usefulness of predictions with different assumptions about the physical state of the organic components  
641 for the interpretation of experimental data, such as in the case of mixtures of 4-hydroxybenzoic acid and  
642 ammonium sulfate. However, the accurate prediction of AS efflorescence or its suppression in mixed  
643 particles is difficult. The E-AIM-predicted growth curves reproduce the measured hygroscopic behavior  
644 relatively well for the consideration of the effect of 4-hydroxybenzoic acid on the hygroscopic behavior  
645 of mixtures with ammonium sulfate, which leads to suppression of the ammonium sulfate efflorescence.  
646 In the case of mixtures of humic acid and ammonium sulfate, continuous water desorption of aerosol  
647 particles shows no significant effect on the efflorescence of ammonium sulfate. Also, as expected, there  
648 is a clear reduction in the diameter growth factor of mixed systems, in comparison with that of pure AS  
649 particles. In addition, the small difference of hygroscopicity parameters of mix-bio-dry and mix-bio-wet  
650 systems between measured data in the laboratory using HTDMA and the field using CCN activity  
651 measurements is due to the similar O:C ratios of organic surrogate compounds and ammonium sulfate  
652 mass fractions used in the model mixtures when experimental  $\kappa$  data from sub- and super-saturated water  
653 vapor conditions are compared.

654 The range of measurement-model comparisons presented in this study indicate that providing accurate  
655 thermodynamic model predictions of the hygroscopic growth behavior of mixed organic-inorganic

656 systems remains a challenging problem. At moderate and low RH, where aerosol solution phases become  
657 highly concentrated, step-like or gradual crystallization and related solid-liquid equilibria may occur with  
658 high sensitivity to the organic/inorganic mass ratio and the chemical nature of the mixture constituents.  
659 To further improve thermodynamic equilibrium models for the prediction of hygroscopicity and phase  
660 transitions, controlled laboratory experiments with single solutes and/or with mixed organic-inorganic  
661 systems of known phase state will be useful to constrain model parameters. Ideally, such measurements  
662 should cover the high, intermediate and low RH ranges under humidification and dehumidification  
663 conditions.

664

665 **Acknowledgements.** This project was supported by the Strategic Priority Research Program (B) of the  
666 Chinese Academy of Sciences (Grant No. XDB05010400), the National Key Research and Development  
667 Program of China (2016YFC0202202), and the National Natural Science Foundation of China (Contract  
668 No. 91544227, 41227805). The authors would like to thank J. Hong and Z. B. Wang for comments and  
669 suggestions for improvement of the manuscript.

670

## 671 **Reference**

672 Altaf, M. B., Zuend, A., and Freedman, M. A.: Role of nucleation mechanism on the size dependent  
673 morphology of organic aerosol, *Chemical communications*, 52, 9220-9223, 2016.

674 Andreae, M. O. and Gelencser, A.: Black carbon or brown carbon? The nature of light-absorbing  
675 carbonaceous aerosols, *Atmospheric Chemistry and Physics*, 6, 3131-3148, 2006.

676 Apelblat, A.: The vapour pressures of saturated aqueous solutions of potassium bromide, ammonium  
677 sulfate, copper (II) sulfate, iron (II) sulfate, and manganese (II) dichloride, at temperatures from 283 K  
678 to 308 K, *The Journal of Chemical Thermodynamics*, 25, 1513-1520, 1993.

679 Arnold, S., Emmons, L., Monks, S., Law, K. S., Ridley, D., Turquety, S., Tilmes, S., Thomas, J. L.,  
680 Bouarar, I., and Flemming, J.: Biomass burning influence on high-latitude tropospheric ozone and  
681 reactive nitrogen in summer 2008: a multi-model analysis based on POLMIP simulations, *Atmospheric*



682 Chemistry and Physics, 15, 6047-6068, 2015.

683 Artaxo, P., Martins, J. V., Yamasoe, M. A., Procópio, A. S., Pauliquevis, T. M., Andreae, M. O., Guyon,  
684 P., Gatti, L. V., and Leal, A. M. C.: Physical and chemical properties of aerosols in the wet and dry  
685 seasons in Rondônia, Amazonia, *Journal of Geophysical Research: Atmospheres*, 107, LBA 49-41-LBA  
686 49-14, 2002.

687 Atkinson, D. B., Radney, J. G., Lum, J., Kolesar, K. R., Cziczo, D. J., Pekour, M. S., Zhang, Q., Setyan,  
688 A., Zelenyuk, A., and Cappa, C. D.: Aerosol optical hygroscopicity measurements during the 2010  
689 CARES campaign, *Atmospheric Chemistry and Physics*, 15, 4045-4061, 2015.

690 Bahadur, R., Praveen, P. S., Xu, Y. Y., and Ramanathan, V.: Solar absorption by elemental and brown  
691 carbon determined from spectral observations, *Proceedings of the National Academy of Sciences of the*  
692 *United States of America*, 109, 17366-17371, 2012.

693 Beyer, K. D., Friesen, K., Bothe, J. R., and Palet, B.: Phase Diagrams and Water Activities of Aqueous  
694 Dicarboxylic Acid Systems of Atmospheric Importance, *Journal of Physical Chemistry A*, 112, 11704-  
695 11713, 10.1021/jp805985t, 2008.

696 Bodsworth, A., Zobrist, B., and Bertram, A. K.: Inhibition of efflorescence in mixed organic-inorganic  
697 particles at temperatures less than 250 K, *Physical chemistry chemical physics : PCCP*, 12, 12259-12266,  
698 2010.

699 Bones, D. L., Reid, J. P., Lienhard, D. M., and Krieger, U. K.: Comparing the mechanism of water  
700 condensation and evaporation in glassy aerosol, *Proceedings of the National Academy of Sciences*, 109,  
701 11613-11618, 2012.

702 Boucher Olivier and David, R.: *Clouds and Aerosols*, PICC, 2013.

703 Brooks, S. D., DeMott, P. J., and Kreidenweis, S. M.: Water uptake by particles containing humic  
704 materials and mixtures of humic materials with ammonium sulfate, *Atmos. Environ.*, 38, 1859-1868,  
705 2004.

706 Carrico, C. M., Petters, M. D., Kreidenweis, S. M., Collett, J. L., Engling, G., and Malm, W. C.: Aerosol  
707 hygroscopicity and cloud droplet activation of extracts of filters from biomass burning experiments,

708 Journal of Geophysical Research, doi:10.1029/2007JD009274, 2008.

709 Chan, M. N. and Chan, C. K.: Hygroscopic properties of two model humic-like substances and their  
710 mixtures with inorganics of atmospheric importance, *Environmental Science & Technology*, 37, 5109-  
711 5115, 2003.

712 Chan, M. N., Choi, M. Y., Ng, N. L., and Chan, C. K.: Hygroscopicity of water-soluble organic  
713 compounds in atmospheric aerosols: Amino acids and biomass burning derived organic species,  
714 *Environmental Science & Technology*, 39, 1555-1562, 2005.

715 Chan, M. N., Kreidenweis, S. M., and Chan, C. K.: Measurements of the Hygroscopic and Deliquescence  
716 Properties of Organic Compounds of Different Solubilities in Water and Their Relationship with Cloud  
717 Condensation Nuclei Activities, *Environmental Science & Technology*, 42, 3602-3608, 2008.

718 Chan, M. N. C. a. C. K.: Mass transfer effects in hygroscopic measurements of aerosol particles,  
719 *Atmospheric Chemistry and Physics*, 2005. 2005.

720 Cheung, H. H. Y., Yeung, M. C., Li, Y. J., Lee, B. P., and Chan, C. K.: Relative Humidity-Dependent  
721 HTDMA Measurements of Ambient Aerosols at the HKUST Supersite in Hong Kong, China, *Aerosol  
722 Science and Technology*, 49, 643-654, 2015.

723 Cheng, Y. F., Su, H., Rose, D., Gunthe, S. S., Berghof, M., Wehner, B., Achtert, P., Nowak, A., Takegawa,  
724 N., Kondo, Y., Shiraiwa, M., Gong, Y. G., Shao, M., Hu, M., Zhu, T., Zhang, Y. H., Carmichael, G. R.,  
725 Wiedensohler, A., Andreae, M. O., and Pöschl, U.: Size-resolved measurement of the mixing state of soot  
726 in the megacity Beijing, China: diurnal cycle, aging and parameterization, *Atmospheric Chemistry and  
727 Physics*, 12, 4477-4491, 2012.

728 Choi, M. Y. and Chan, C. K.: The effects of organic species on the hygroscopic behaviors of inorganic  
729 aerosols, *Environmental science & technology*, 36, 2422-2428, 2002.

730 Ciarelli, G., Aksoyoglu, S., Crippa, M., Jimenez, J. L., Nemitz, E., Sellegri, K., Äijälä, M., Carbone, S.,  
731 Mohr, C., O'Dowd, C., Poulain, L., Baltensperger, U., and Prévôt, A. S. H.: Evaluation of European air  
732 quality modelled by CAMx including the volatility basis set scheme, *Atmos. Chem. Phys.*, 16, 10313-  
733 10332, 2016.

734 Ciobanu, V. G., Marcolli, C., Krieger, U. K., Zuend, A., and Peter, T.: Efflorescence of ammonium sulfate  
735 and coated ammonium sulfate particles: evidence for surface nucleation, *The Journal of Physical*  
736 *Chemistry A*, 114, 9486-9495, 2010.

737 Clegg, S. L. and Seinfeld, J. H.: Thermodynamic models of aqueous solutions containing inorganic  
738 electrolytes and dicarboxylic acids at 298.15 K. 2. Systems including dissociation equilibria, *Journal of*  
739 *Physical Chemistry A*, 110, 5718-5734, 2006.

740 Clegg, S. L. and Wexler, A. S.: Densities and Apparent Molar Volumes of Atmospherically Important  
741 Electrolyte Solutions. 1. The Solutes H<sub>2</sub>SO<sub>4</sub>, HNO<sub>3</sub>, HCl, Na<sub>2</sub>SO<sub>4</sub>, NaNO<sub>3</sub>, NaCl, (NH<sub>4</sub>)<sub>2</sub>SO<sub>4</sub>,  
742 NH<sub>4</sub>NO<sub>3</sub>, and NH<sub>4</sub>Cl from 0 to 50 degrees C, Including Extrapolations to Very Low Temperature and  
743 to the Pure Liquid State, and NaHSO<sub>4</sub>, NaOH, and NH<sub>3</sub> at 25 degrees C, *Journal of Physical Chemistry*  
744 *A*, 115, 3393-3460, 2011a.

745 Clegg, S. L. and Wexler, A. S.: Densities and apparent molar volumes of atmospherically important  
746 electrolyte solutions. 2. The systems H<sup>(+)</sup>-HSO<sub>4</sub><sup>(-)</sup>-SO<sub>4</sub><sup>(2-)</sup>-H<sub>2</sub>O from 0 to 3 mol kg<sup>(-1)</sup> as a function of  
747 temperature and H<sup>(+)</sup>-NH<sub>4</sub><sup>(+)</sup>-HSO<sub>4</sub><sup>(-)</sup>-SO<sub>4</sub><sup>(2-)</sup>-H<sub>2</sub>O from 0 to 6 mol kg<sup>(-1)</sup> at 25 degrees C using a Pitzer ion  
748 interaction model, and NH<sub>4</sub>HSO<sub>4</sub>-H<sub>2</sub>O and (NH<sub>4</sub>)<sub>3</sub>H(SO<sub>4</sub>)<sub>2</sub>-H<sub>2</sub>O over the entire concentration range, *The*  
749 *journal of physical chemistry. A*, 115, 3461-3474, 2011b.

750 Decesari, S., Fuzzi, S., Facchini, M. C., Mircea, M., Emblico, L., Cavalli, F., Maenhaut, W., Chi, X.,  
751 Schkolnik, G., Falkovich, A., Rudich, Y., Claeys, M., Pashynska, V., Vas, G., Kourtchev, I., Vermeylen,  
752 R., Hoffer, A., Andreae, M. O., Tagliavini, E., Moretti, F., and Artaxo, P.: Characterization of the organic  
753 composition of aerosols from Rondonia, Brazil, during the LBA-SMOCC 2002 experiment and its  
754 representation through model compounds, *Atmospheric Chemistry and Physics*, 6, 375-402, 2006.

755 Denjean, C., Formenti, P., Picquet-Varrault, B., Pangui, E., Zapf, P., Katrib, Y., Giorio, C., Tapparo, A.,  
756 Monod, A., and Temime-Roussel, B.: Relating hygroscopicity and optical properties to chemical  
757 composition and structure of secondary organic aerosol particles generated from the ozonolysis of  $\alpha$ -  
758 pinene, *Atmospheric Chemistry and Physics*, 15, 3339-3358, 2015.

759 Dick, W. D., Saxena, P., and McMurry, P. H.: Estimation of water uptake by organic compounds in  
760 submicron aerosols measured during the Southeastern Aerosol and Visibility Study, *Journal of*

761 Geophysical Research-Atmospheres, 105, 1471-1479, 2000.

762 Dusek, U., Frank, G. P., Massling, A., Zeromskiene, K., Iinuma, Y., Schmid, O., Helas, G., Hennig, T.,  
763 Wiedensohler, A., and Andreae, M. O.: Water uptake by biomass burning aerosol at sub- and  
764 supersaturated conditions: closure studies and implications for the role of organics, Atmospheric  
765 Chemistry and Physics, 11, 9519-9532, 2011.

766 Engelhart, G. J., Hennigan, C. J., Miracolo, M. A., Robinson, A. L., and Pandis, S. N.: Cloud  
767 condensation nuclei activity of fresh primary and aged biomass burning aerosol, Atmospheric Chemistry  
768 and Physics, 12, 7285-7293, 2012.

769 Favez, O., Alfaro, S. C., Sciare, J., Cachier, H., and Abdelwahab, M. M.: Ambient measurements of light-  
770 absorption by agricultural waste burning organic aerosols, Journal of Aerosol Science, 40, 613-620, 2009.

771 Feng, Y., Chen, Y., Guo, H., Zhi, G., Xiong, S., Li, J., Sheng, G., and Fu, J.: Characteristics of organic  
772 and elemental carbon in PM<sub>2.5</sub> samples in Shanghai, China, Atmospheric Research, 92, 434-442, 2009.

773 Frosch, M., Prisle, N. L., Bilde, M., Varga, Z., and Kiss, G.: Joint effect of organic acids and inorganic  
774 salts on cloud droplet activation, Atmospheric Chemistry and Physics, 11, 3895-3911, 10.5194/acp-11-  
775 3895-2011, 2011.

776 Gilman, J. B., Lerner, B. M., Kuster, W. C., Goldan, P. D., Warneke, C., Veres, P. R., Roberts, J. M., de  
777 Gouw, J. A., Burling, I. R., and Yokelson, R. J.: Biomass burning emissions and potential air quality  
778 impacts of volatile organic compounds and other trace gases from fuels common in the US, Atmos. Chem.  
779 Phys., 15, 13915-13938, 2015.

780 Gupta, D., Eom, H. J., Cho, H. R., and Ro, C. U.: Hygroscopic behavior of NaCl–MgCl<sub>2</sub> mixture  
781 particles as nascent sea-spray aerosol surrogates and observation of efflorescence during humidification,  
782 Atmos. Chem. Phys., 15, 11273-11290, 2015.

783 Hanford, K. L., Mitchem, L., Reid, J. P., Clegg, S. L., Topping, D. O., and McFiggans, G. B.:  
784 Comparative thermodynamic studies of aqueous glutaric acid, ammonium sulfate and sodium chloride  
785 aerosol at high humidity, Journal of Physical Chemistry A, 112, 9413-9422, 10.1021/jp802520d, 2008.

786 Hecobian, A., Zhang, X., Zheng, M., Frank, N., Edgerton, E. S., and Weber, R. J.: Water-Soluble Organic

787 Aerosol material and the light-absorption characteristics of aqueous extracts measured over the  
788 Southeastern United States, *Atmospheric Chemistry and Physics*, 10, 5965-5977, 2010.

789 Hegg, D. A., Warren, S. G., Grenfell, T. C., Doherty, S. J., and Clarke, A. D.: Sources of light-absorbing  
790 aerosol in arctic snow and their seasonal variation, *Atmospheric Chemistry and Physics*, 10, 10923-10938,  
791 2010.

792 Hodas, N., Zuend, A., Mui, W., Flagan, R., and Seinfeld, J.: Influence of particle-phase state on the  
793 hygroscopic behavior of mixed organic-inorganic aerosols, *Atmospheric Chemistry and Physics*, 15,  
794 5027-5045, 2015.

795 Hodas, N., Zuend, A., Schilling, K., Berkemeier, T., Shiraiwa, M., Flagan, R. C., and Seinfeld, J. H.:  
796 Discontinuities in hygroscopic growth below and above water saturation for laboratory surrogates of  
797 oligomers in organic atmospheric aerosols, *Atmos. Chem. Phys.*, doi: 10.5194/acp-16-12767-2016, 2016.

798 Jacobson, M. Z.: Effects of biomass burning on climate, accounting for heat and moisture fluxes, black  
799 and brown carbon, and cloud absorption effects, *Journal of Geophysical Research-Atmospheres*, 119,  
800 8980-9002, 2014.

801 Jedelský Jiri, L. i. H. e. y., Pavel Hynčica, and Ivan and Cibulka: Partial molar volumes of organic  
802 solutes in water. IV. Benzoic and hydroxybenzoic acids at temperatures from T D 298 K to T D 498 K  
803 and pressures up to 30 MPa, *J. Chem. Thermodynamics*, 32, 11, 2000.

804 Jing, B., Tong, S., Liu, Q., Li, K., Wang, W., Zhang, Y., and Ge, M.: Hygroscopic behavior of  
805 multicomponent organic aerosols and their internal mixtures with ammonium sulfate, *Atmospheric  
806 Chemistry and Physics*, 16, 4101-4118, 2016.

807 Kim, J., Ahlm, L., Yli-Juuti, T., Lawler, M., Keskinen, H., Tröstl, J., Schobesberger, S., Duplissy, J.,  
808 Amorim, A., Bianchi, F., Donahue, N. M., Flagan, R. C., Hakala, J., Heinritzi, M., Jokinen, T., Kürten,  
809 A., Laaksonen, A., Lehtipalo, K., Miettinen, P., Petäjä, T., Rissanen, M. P., Rondo, L., Sengupta, K.,  
810 Simon, M., Tomé, A., Williamson, C., Wimmer, D., Winkler, P. M., Ehrhart, S., Ye, P., Kirkby, J., Curtius,  
811 J., Baltensperger, U., Kulmala, M., Lehtinen, K. E. J., Smith, J. N., Riipinen, I., and Virtanen, A.:  
812 Hygroscopicity of nanoparticles produced from homogeneous nucleation in the CLOUD experiments,  
813 *Atmos. Chem. Phys.*, 16, 293-304, 2016.

814 Kiss, G., Tombácz, E., and Hansson, H.-C.: Surface Tension Effects of Humic-Like Substances in the  
815 Aqueous Extract of Tropospheric Fine Aerosol, *Journal of Atmospheric Chemistry*, 50, 279-294, 2005.

816 Koop, T., Bookhold, J., Shiraiwa, M., and Poschl, U.: Glass transition and phase state of organic  
817 compounds: dependency on molecular properties and implications for secondary organic aerosols in the  
818 atmosphere, *Physical Chemistry Chemical Physics*, 13, 19238-19255, 2011.

819 Konovalov, I. B., Beekmann, M., Berezin, E. V., Petetin, H., Mielonen, T., Kuznetsova, I. N., and Andreae,  
820 M. O.: The role of semi-volatile organic compounds in the mesoscale evolution of biomass burning  
821 aerosol: a modeling case study of the 2010 mega-fire event in Russia, *Atmos. Chem. Phys.*, 15, 13269-  
822 13297, 2015.

823 Laborde, M., Crippa, M., Tritscher, T., Juranyi, Z., Decarlo, P. F., Temime-Roussel, B., Marchand, N.,  
824 Eckhardt, S., Stohl, A., Baltensperger, U., Prevot, A. S. H., Weingartner, E., and Gysel, M.: Black carbon  
825 physical properties and mixing state in the European megacity Paris, *Atmospheric Chemistry and Physics*,  
826 13, 5831-5856, 2013.

827 Lack, D. A., Bahreni, R., Langridge, J. M., Gilman, J. B., and Middlebrook, A. M.: Brown carbon  
828 absorption linked to organic mass tracers in biomass burning particles, *Atmospheric Chemistry and*  
829 *Physics*, 13, 2415-2422, 2013.

830 Lack, D. A., Bahreni, R., Langridge, J. M., Gilman, J. B., and Middlebrook, A. M.: Brown carbon  
831 absorption linked to organic mass tracers in biomass burning particles, *Atmospheric Chemistry and*  
832 *Physics*, 13, 2415-2422, 2013.

833 Lack, D. A., Langridge, J. M., Bahreini, R., Cappa, C. D., Middlebrook, A. M., and Schwarz, J. P.: Brown  
834 carbon and internal mixing in biomass burning particles, *Proceedings of the National Academy of*  
835 *Sciences of the United States of America*, 109, 14802-14807, 2012.

836 Lawson, S. J., Keywood, M. D., Galbally, I. E., Gras, J. L., Cainey, J. M., Cope, M. E., Krummel, P. B.,  
837 Fraser, P. J., Steele, L. P., Bentley, S. T., Meyer, C. P., Ristovski, Z., and Goldstein, A. H.: Biomass  
838 burning emissions of trace gases and particles in marine air at Cape Grim, Tasmania, *Atmos. Chem. Phys.*,  
839 15, 13393-13411, 2015.

840 Lee, Y. N.: Airborne measurement of inorganic ionic components of fine aerosol particles using the  
841 particle-into-liquid sampler coupled to ion chromatography technique during ACE-Asia and TRACE-P,  
842 Journal of Geophysical Research, doi:10.1029/2002JD003265, 2003.

843 Lei, T., Zuend, A., Wang, W. G., Zhang, Y. H., and Ge, M. F.: Hygroscopicity of organic compounds from  
844 biomass burning and their influence on the water uptake of mixed organic ammonium sulfate aerosols,  
845 Atmospheric Chemistry and Physics, 14, 1-20, 2014.

846 Lienhard, D. M., Bones, D. L., Zuend, A., Krieger, U. K., Reid, J. P., and Peter, T.: Measurements of  
847 thermodynamic and optical properties of selected aqueous organic and organic-inorganic mixtures of  
848 atmospheric relevance, The journal of physical chemistry. A, 116, 9954-9968, 2012.

849 Liu, B. Y. H., Pui, D. Y. H., and Rubow, K. L. a. S., W.W.: ELECTROSTATIC EFFECTS IN AEROSOL  
850 SAMPLING AND FILTRATION, Arm. occup. Hyg., 29, 251-269, 1985.

851 Liu, J. M., Scheuer, E., Dibb, J., Ziemba, L. D., Thornhill, K. L., Anderson, B. E., Wisthaler, A., Mikoviny,  
852 T., Devi, J. J., Bergin, M., and Weber, R. J.: Brown carbon in the continental troposphere, Geophysical  
853 Research Letters, 41, 2191-2195, 2014.

854 Liu, Q., Jing, B., Peng, C., Tong, S., Wang, W., and Ge, M.: Hygroscopicity of internally mixed multi-  
855 component aerosol particles of atmospheric relevance, Atmos. Environ., 125, 69-77, 2016.

856 Malm, W. C. and Kreidenweis, S. M.: The effects of models of aerosol hygroscopicity on the  
857 apportionment of extinction, Atmos. Environ., 31, 1965-1976, 1997.

858 MAN NIN CHAN, A. K. Y. L., AND and CHAN, C. K.: Responses of Ammonium Sulfate Particles  
859 Coated with Glutaric Acid to Cyclic Changes in Relative Humidity: Hygroscopicity and Raman  
860 Characterization, Environ.Sci.Technol., 40, 6893-6989, 2006.

861 Man Nin Chan, C. K. C.: Mass transfer effects on the hygroscopic growth of ammonium sulfate particles  
862 with a water-insoluble coating, Atmos. Environ., doi: 10.1016/j.atmosenv.2007.01.047, 2007.

863 Marcolli, C. and Peter, T.: Water activity in polyol/water systems: new UNIFAC parameterization, Atmos.  
864 Chem. Phys., 5, 1545-1555, 2005.

865 Marshall, F. H., Miles, R. E. H., Song, Y.-C., Ohm, P. B., Power, R. M., Reid, J. P., and Dutcher, C. S.:  
866 Diffusion and reactivity in ultraviscous aerosol and the correlation with particle viscosity, *Chemical*  
867 *Science*, 7, 1298-1308, 2016.

868 Martin, M., Tritscher, T., Juranyi, Z., Heringa, M. F., Sierau, B., Weingartner, E., Chirico, R., Gysel, M.,  
869 Prevot, A. S. H., Baltensperger, U., and Lohmann, U.: Hygroscopic properties of fresh and aged wood  
870 burning particles, *Journal of Aerosol Science*, 56, 15-29, 2013.

871 Mikhailov, E., Vlasenko, S., Rose, D., and Pöschl, U.: Mass-based hygroscopicity parameter interaction  
872 model and measurement of atmospheric aerosol water uptake, *Atmospheric Chemistry and Physics*, 13,  
873 717-740, 2013.

874 Mochida, M. and Kawamura, K.: Hygroscopic properties of levoglucosan and related organic compounds  
875 characteristic to biomass burning aerosol particles, *Journal of Geophysical Research-Atmospheres*,  
876 doi:10.1029/2004JD004962, 2004.

877 Moosmuller, H., Chakrabarty, R. K., and Arnott, W. P.: Aerosol light absorption and its measurement: A  
878 review, *Journal of Quantitative Spectroscopy & Radiative Transfer*, 110, 844-878, 2009.

879 Paglione, M., Saarikoski, S., Carbone, S., Hillamo, R., Facchini, M. C., Finessi, E., Giulianelli, L.,  
880 Carbone, C., Fuzzi, S., Moretti, F., Tagliavini, E., Swietlicki, E., Stenstrom, K. E., Prevot, A. S. H.,  
881 Massoli, P., Canaragatna, M., Worsnop, D., and Decesari, S.: Primary and secondary biomass burning  
882 aerosols determined by proton nuclear magnetic resonance (<sup>1</sup>H-NMR) spectroscopy during the 2008  
883 EUCAARI campaign in the Po Valley (Italy), *Atmospheric Chemistry and Physics*, 14, 5089-5110, 2014.

884 Pajunoja, A, AT Lambe, J Hakala, N Rastak, MJ Cummings, JF Brogan, L Hao, M Paramonov, J  
885 Hong, NL Prisle, J Malila, S Romakkaniemi, KEJ Lehtinen, A Laaksonen, M Kulmala, P Massoli, TB  
886 Onasch, NM Donahue, I Riipinen, P Davidovits, DR Worsnop, T Petäjä, and A  
887 Virtanen (2015), Adsorptive uptake of water by semisolid secondary organic aerosols. *Geophys. Res.*  
888 *Let.*, 42, 3063–3068. doi: 10.1002/2015GL063142.

889 Ovadnevaite, J., Zuend, A., Laaksonen, A., Sanchez, K. J., Roberts, G., Ceburnis, D., Decesari, S.,  
890 Rinaldi, M., Hodas, N., Facchini, M. C., Seinfeld, J. H., and O’ Dowd, C.: Surface tension prevails over  
891 solute effect in organic-influenced cloud droplet activation, *Nature*, 546, 637-641, 10.1038/nature22806,



892 2017.

893 Peng, C., Chan, M. N., and Chan, C. K.: The hygroscopic properties of dicarboxylic and multifunctional  
894 acids: Measurements and UNIFAC predictions, *Environmental Science & Technology*, 35, 4495-4501,  
895 2001.

896 Petters, M. D. and Kreidenweis, S. M.: A single parameter representation of hygroscopic growth and  
897 cloud condensation nucleus activity, *Atmos. Chem. Phys.*, 7, 1961-1971, 2007.

898 Pöhlker, M. L., Pöhlker, C., Ditas, F., Klimach, T., Hrabe de Angelis, I., Araújo, A., Brito, J., Carbone,  
899 S., Cheng, Y., and Chi, X.: Long-term observations of cloud condensation nuclei in the Amazon rain  
900 forest—Part 1: Aerosol size distribution, hygroscopicity, and new model parametrizations for CCN  
901 prediction, *Atmospheric Chemistry and Physics*, 16, 15709-15740, 2016.

902 Powelson, M. H., Espelien, B. M., Hawkins, L. N., Galloway, M. M., and De Haan, D. O.: Brown Carbon  
903 Formation by Aqueous-Phase Carbonyl Compound Reactions with Amines and Ammonium Sulfate,  
904 *Environmental Science & Technology*, 48, 985-993, 2014.

905 Pratt, K. A., Murphy, S. M., Subramanian, R., DeMott, P. J., Kok, G. L., Campos, T., Rogers, D. C.,  
906 Prenni, A. J., Heymsfield, A. J., Seinfeld, J. H., and Prather, K. A.: Flight-based chemical characterization  
907 of biomass burning aerosols within two prescribed burn smoke plumes, *Atmospheric Chemistry and*  
908 *Physics*, 11, 12549-12565, 2011.

909 Pratt, K. A. and Prather, K. A.: Aircraft measurements of vertical profiles of aerosol mixing states, *Journal*  
910 *of Geophysical Research*, doi:10.1029/2009JD013150, 2010.

911 Rastak, N., Pajunoja, A., Acosta Navarro, J. C., Ma, J., Song, M., Partridge, D. G., Kirkevåg, A., Leong,  
912 Y., Hu, W. W., Taylor, N. F., Lambe, A., Cerully, K., Bougiatioti, A., Liu, P., Krejci, R., Petäjä, T., Percival,  
913 C., Davidovits, P., Worsnop, D. R., Ekman, A. M. L., Nenes, A., Martin, S., Jimenez, J. L., Collins, D.  
914 R., Topping, D. O., Bertram, A. K., Zuend, A., Virtanen, A., and Riipinen, I.: Microphysical explanation  
915 of the RH-dependent water affinity of biogenic organic aerosol and its importance for climate,  
916 *Geophysical Research Letters*, doi: 10.1002/2017GL073056. 2017.

917 Reid, J. P., Dennis-Smith, B. J., Kwamena, N.-O. A., Miles, R. E. H., Hanford, K. L., and Homer, C.

918 J.: The morphology of aerosol particles consisting of hydrophobic and hydrophilic phases: hydrocarbons,  
919 alcohols and fatty acids as the hydrophobic component, *Physical Chemistry Chemical Physics*, 13,  
920 15559-15572, 2011.

921 Renbaum-Wolff, L., Song, M., Marcolli, C., Zhang, Y., Liu, P. F., Grayson, J. W., Geiger, F. M., Martin,  
922 S. T., and Bertram, A. K.: Observations and implications of liquid–liquid phase separation at high relative  
923 humidities in secondary organic material produced by  $\alpha$ -pinene ozonolysis without inorganic salts,  
924 *Atmos. Chem. Phys.*, 16, 7969-7979, 2016.

925 Rissler, J., Vestin, A., Swietlicki, E., Fisch, G., Zhou, J., Artaxo, P., and Andreae, M. O.: Size distribution  
926 and hygroscopic properties of aerosol particles from dry-season biomass burning in Amazonia,  
927 *Atmospheric Chemistry and Physics*, 6, 471-491, 2006.

928 Rizzo, L. V., Correia, A. L., Artaxo, P., Procopio, A. S., and Andreae, M. O.: Spectral dependence of  
929 aerosol light absorption over the Amazon Basin, *Atmospheric Chemistry and Physics*, 11, 8899-8912,  
930 2011.

931 Rose, D., Gunthe, S. S., Su, H., Garland, R. M., Yang, H., Berghof, M., Cheng, Y. F., Wehner, B., Achtert,  
932 P., Nowak, A., Wiedensohler, A., Takegawa, N., Kondo, Y., Hu, M., Zhang, Y., Andreae, M. O., and  
933 Poschl, U.: Cloud condensation nuclei in polluted air and biomass burning smoke near the mega-city  
934 Guangzhou, China -Part 2: Size-resolved aerosol chemical composition, diurnal cycles, and externally  
935 mixed weakly CCN-active soot particles, *Atmospheric Chemistry and Physics*, 11, 2817-2836, 2011.

936 Saarnio, K., Aurela, M., Timonen, H., Saarikoski, S., Teinila, K., Makela, T., Sofiev, M., Koskinen, J.,  
937 Aalto, P. P., Kulmala, M., Kukkonen, J., and Hillamo, R.: Chemical composition of fine particles in fresh  
938 smoke plumes from boreal wild-land fires in Europe, *Science of the Total Environment*, 408, 2527-2542,  
939 2010.

940 Sadezky, A., Muckenhuber, H., Grothe, H., Niessner, R., and Poschl, U.: Raman micro spectroscopy of  
941 soot and related carbonaceous materials: Spectral analysis and structural information, *Carbon*, 43, 1731-  
942 1742, 2005.

943 Saleh, R., Hennigan, C. J., McMeeking, G. R., Chuang, W. K., Robinson, E. S., Coe, H., Donahue, N.  
944 M., and Robinson, A. L.: Absorptivity of brown carbon in fresh and photo-chemically aged biomass-

945 burning emissions, *Atmospheric Chemistry and Physics*, 13, 7683-7693, 2013.

946 Saleh, R., Robinson, E. S., Tkacik, D. S., Ahern, A. T., Liu, S., Aiken, A. C., Sullivan, R. C., Presto, A.  
947 A., Dubey, M. K., Yokelson, R. J., Donahue, N. M., and Robinson, A. L.: Brownness of organics in  
948 aerosols from biomass burning linked to their black carbon content, *Nature Geoscience*, 7, 647-650, 2014.

949 Seinfeld, J. and Pandis, S.: *Atmospheric chemistry and physics*. Hoboken, NJ: Wiley, 2006.

950 Shantanu H. Jathar, A. M., Kekkey C. Barsabti, William E. Asher, James F. Pankow and Michael J.  
951 Kleeman: Water uptake by organic aerosol and its influence on gas/particle partitioning of secondary  
952 organic aerosol in the United States doi: 10.1016/j.atmosenv.2016.01.001, 2016.

953 Shiraiwa, M., Zuend, A., Bertram, A. K., and Seinfeld, J. H.: Gas-particle partitioning of atmospheric  
954 aerosols: interplay of physical state, non-ideal mixing and morphology, *Physical Chemistry Chemical  
955 Physics*, 15, 11441-11453, 2013.

956 Sjogren, S., Gysel, M., Weingartner, E., Baltensperger, U., Cubison, M. J., Coe, H., Zardini, A. A.,  
957 Marcolli, C., Krieger, U. K., and Peter, T.: Hygroscopic growth and water uptake kinetics of two-phase  
958 aerosol particles consisting of ammonium sulfate, adipic and humic acid mixtures, *Journal of Aerosol  
959 Science*, 38, 157-171, 2007.

960 Smith, M. L., Bertram, A. K., and Martin, S. T.: Deliquescence, efflorescence, and phase miscibility of  
961 mixed particles of ammonium sulfate and isoprene-derived secondary organic material, *Atmospheric  
962 Chemistry and Physics*, 12, 9613-9628, 2012.

963 Song, M., Marcolli, C., Krieger, U. K., Zuend, A., and Peter, T.: Liquid-liquid phase separation and  
964 morphology of internally mixed dicarboxylic acids/ammonium sulfate/water particles, *Atmospheric  
965 Chemistry and Physics*, 12, 2691-2712, 2012.

966 Song, M., Marcolli, C., Krieger, U. K., Zuend, A., and Peter, T.: Liquid-liquid phase separation in aerosol  
967 particles: Dependence on O:C, organic functionalities, and compositional complexity, *Geophysical  
968 Research Letters*, 39, doi:10.1029/2012GL052807, 2012.

969 Srinivas, B. and Sarin, M. M.: Brown carbon in atmospheric outflow from the Indo-Gangetic Plain: Mass  
970 absorption efficiency and temporal variability, *Atmos. Environ.*, 89, 835-843, 2014.

971 Srinivas, B. and Sarin, M. M.: Light absorbing organic aerosols (brown carbon) over the tropical Indian  
972 Ocean: impact of biomass burning emissions, *Environmental Research Letters*, doi:10.1088/1748-  
973 9326/8/4/044042, 2013.

974 Svenningsson, B., Rissler, J., Swietlicki, E., Mircea, M., Bilde, M., Facchini, M. C., Decesari, S., Fuzzi,  
975 S., Zhou, J., Monster, J., and Rosenorn, T.: Hygroscopic growth and critical supersaturations for mixed  
976 aerosol particles of inorganic and organic compounds of atmospheric relevance, *Atmospheric Chemistry  
977 and Physics*, 6, 1937-1952, 2006.

978 Topping, D., McFiggans, G., and Coe, H.: A curved multi-component aerosol hygroscopicity model  
979 framework: Part 1–Inorganic compounds, *Atmospheric Chemistry and Physics*, 5, 1205-1222, 2005.

980 Tuckermann, R. a. C., H. K.: The surface tension of aqueous solutions of some atmospheric water-soluble  
981 organic compounds, *Atmos. Environ.*, 38, 6135-6138, 2004.

982 Väkevä, M., Kulmala, M., Stratmann, F., and Hämeri, K.: Field measurements of hygroscopic properties  
983 and state of mixing of nucleation mode particles, *Atmospheric Chemistry and Physics*, 2, 55-66, 2002.

984 Veghte, D. P., Altaf, M. B., and Freedman, M. A.: Size dependence of the structure of organic aerosol,  
985 *Journal of the American Chemical Society*, 135, 16046-16049, 2013.

986 Gonçalves, W. A., Machado, L. A. T., and Kirstetter, P.-E.: Influence of biomass aerosol on precipitation  
987 over the Central Amazon: an observational study, *Atmos. Chem. Phys.*, doi: 10.5194/acp-15-6789-2015,  
988 2015.

989 Wang, J., Cubison, M. J., Aiken, A. C., Jimenez, J. L., and Collins, D. R.: The importance of aerosol  
990 mixing state and size-resolved composition on CCN concentration and the variation of the importance  
991 with atmospheric aging of aerosols, *Atmospheric Chemistry and Physics*, 10, 7267-7283, 2010.

992 Wang, X., Heald, C. L., Ridley, D. A., Schwarz, J. P., Spackman, J. R., Perring, A. E., Coe, H., Liu, D.,  
993 and Clarke, A. D.: Exploiting simultaneous observational constraints on mass and absorption to estimate  
994 the global direct radiative forcing of black carbon and brown carbon, *Atmospheric Chemistry and Physics*,  
995 14, 10989-11010, 2014.

996 Whitehead, J. D., Darbyshire, E., Brito, J., Barbosa, H. M., Crawford, I., Stern, R., Gallagher, M. W.,

997 Kaye, P. H., Allan, J. D., and Coe, H.: Biogenic cloud nuclei in the central Amazon during the transition  
998 from wet to dry season, *Atmospheric Chemistry and Physics*, 16, 9727-9743, 2016.

999 Wu, Z. J., Zheng, J., Shang, D. J., Du, Z. F., Wu, Y. S., Zeng, L. M., Wiedensohler, A., and Hu, M.:  
1000 Particle hygroscopicity and its link to chemical composition in the urban atmosphere of Beijing, China,  
1001 during summertime, *Atmos. Chem. Phys.*, 16, 1123-1138, 2016.

1002 Yates III, L. M., Wandruszka, R.V.: Decontamination of polluted water by treatment with a crude humic  
1003 acid blend, *Environmental Science and Technology*, 33, 2076-2080, 1999.

1004 You, Y. and Bertram, A. K.: Effects of molecular weight and temperature on liquid–liquid phase  
1005 separation in particles containing organic species and inorganic salts, *Atmospheric Chemistry and*  
1006 *Physics*, 15, 1351-1365, 2015.

1007 You, Y., Renbaum-Wolff, L., and Bertram, A. K.: Liquid–liquid phase separation in particles containing  
1008 organics mixed with ammonium sulfate, ammonium bisulfate, ammonium nitrate or sodium chloride,  
1009 *Atmospheric Chemistry and Physics*, 13, 11723-11734, 2013.

1010 Yuan Youa, L. R.-W., Marc Carreras-Sospedrab, Sarah J. Hannaa, Naruki Hiranumac, Saeid Kamald.,,  
1011 Mackenzie L. Smithe, X. Z., Rodney J. Weberf, John E. Shillingg, Donald Dabdubb, Scot T. Martine,h,1.,  
1012 and Bertrama, a. A. K.: Images reveal that atmospheric particles can undergo liquid–liquid phase  
1013 separations, *pnas*, 109, 13188-13193, 2012.

1014 Zamora, I. R., Tabazadeh, A., Golden, D. M., and Jacobson, M. Z.: Hygroscopic growth of common  
1015 organic aerosol solutes, including humic substances, as derived from water activity measurements,  
1016 *Journal of Geophysical Research: Atmospheres*, doi:10.1029/2011JD016067, 2011.

1017 Zardini, A. A., Sjogren, S., Marcolli, C., Krieger, U. K., Gysel, M., Weingartner, E., Baltensperger, U.,  
1018 and Peter, T.: A combined particle trap/HTDMA hygroscopicity study of mixed inorganic/organic aerosol  
1019 particles, *Atmospheric Chemistry and Physics*, 8, 5589-5601, 2008.

1020 Zawadowicz, M., Proud, S., Seppalainen, S., and Cziczo, D.: Hygroscopic and phase separation  
1021 properties of ammonium sulfate/organics/water ternary solutions, *Atmospheric Chemistry and Physics*,  
1022 15, 8975-8986, 2015.

1023 Zhang, Q., Jimenez, J. L., Canagaratna, M. R., Allan, J. D., Coe, H., Ulbrich, I., Alfarra, M. R., Takami,  
1024 A., Middlebrook, A. M., Sun, Y. L., Dzepina, K., Dunlea, E., Docherty, K., DeCarlo, P. F., Salcedo, D.,  
1025 Onasch, T., Jayne, J. T., Miyoshi, T., Shimojo, A., Hatakeyama, S., Takegawa, N., Kondo, Y., Schneider,  
1026 J., Drewnick, F., Borrmann, S., Weimer, S., Demerjian, K., Williams, P., Bower, K., Bahreini, R., Cottrell,  
1027 L., Griffin, R. J., Rautiainen, J., Sun, J. Y., Zhang, Y. M., and Worsnop, D. R.: Ubiquity and dominance  
1028 of oxygenated species in organic aerosols in anthropogenically-influenced Northern Hemisphere  
1029 midlatitudes, *Geophysical Research Letters*, doi:10.1029/2007GL029979, 2007.

1030 Zhang, S. L., Ma, N., Kecorius, S., Wang, P. C., Hu, M., Wang, Z. B., Groß, J., Wu, Z. J., and  
1031 Wiedensohler, A.: Mixing state of atmospheric particles over the North China Plain, *Atmos. Environ.*,  
1032 125, Part A, 152-164, 2016.

1033 Zhong, M. and Jang, M.: Dynamic light absorption of biomass-burning organic carbon photochemically  
1034 aged under natural sunlight, *Atmospheric Chemistry and Physics*, 14, 1517-1525, 2014.

1035 Zuend, A., Marcolli, C., Booth, A. M., Lienhard, D. M., Soonsin, V., Krieger, U. K., Topping, D. O.,  
1036 McFiggans, G., Peter, T., and Seinfeld, J. H.: New and extended parameterization of the thermodynamic  
1037 model AIOMFAC: calculation of activity coefficients for organic-inorganic mixtures containing carboxyl,  
1038 hydroxyl, carbonyl, ether, ester, alkenyl, alkyl, and aromatic functional groups, *Atmospheric Chemistry  
1039 and Physics*, 11, 9155-9206, 2011.

1040 Zuend, A., Marcolli, C., Luo, B. P., and Peter, T.: A thermodynamic model of mixed organic-inorganic  
1041 aerosols to predict activity coefficients, *Atmospheric Chemistry and Physics*, 8, 4559-4593, 2008.

1042 Zuend, A., Marcolli, C., Peter, T., and Seinfeld, J. H.: Computation of liquid-liquid equilibria and phase  
1043 stabilities: implications for RH-dependent gas/particle partitioning of organic-inorganic aerosols,  
1044 *Atmospheric Chemistry and Physics*, 10, 7795-7820, 2010.

1045 Zuend, A. and Seinfeld, J. H.: Modeling the gas-particle partitioning of secondary organic aerosol: the  
1046 importance of liquid-liquid phase separation, *Atmospheric Chemistry and Physics*, 12, 3857-3882, 2012.

1047  
1048  
1049

1050 **Table 1.** Substances and their physical properties used in this work.

| Chemical compound     | Chemical formula                                | Molar Mass [g mol <sup>-1</sup> ] | Density in solid or liquid state [g cm <sup>-3</sup> ]     | Solubility g/100cm <sup>3</sup> H <sub>2</sub> O | Solution surface tension [J m <sup>-2</sup> ] | Manufacturer       |
|-----------------------|-------------------------------------------------|-----------------------------------|------------------------------------------------------------|--------------------------------------------------|-----------------------------------------------|--------------------|
| Ammonium sulfate      | (NH <sub>4</sub> ) <sub>2</sub> SO <sub>4</sub> | 132.140                           | 1.770 <sup>a</sup> (solid),<br>1.550 <sup>a</sup> (liquid) | 74.400(at 20°C)                                  | 0.072(0.001-10mg/mL)                          | Alfa Aesar, 99.95% |
| Levogluconan          | C <sub>6</sub> H <sub>10</sub> O <sub>5</sub>   | 126.100                           | 1.618 <sup>b</sup> (solid)<br>1.512 <sup>b</sup> (liquid)  |                                                  | 0.073 <sup>c</sup><br>(0.01-10mg/mL)          | Aldrich, 99%       |
| 4-Hydroxybenzoic acid | C <sub>7</sub> H <sub>6</sub> O <sub>3</sub>    | 138.100                           | 1.460(solid)<br>1.372 <sup>f</sup> (liquid)                | 0.675(at 25°C)                                   | 0.070 <sup>g</sup><br>(>10mg/mL)              | Alfa Aesar, 99.99% |
| Humic acid            |                                                 | NA                                | 0.800 <sup>h</sup> (solid)                                 | NA                                               | NA                                            | Aldrich, 99%       |

1051 <sup>a</sup>Clegg and Wexler, (2011);1052 <sup>b</sup>Lienhard et al, (2012);1053 <sup>c</sup>Tuckermann and Cammenga (2004) at 293K;1054 <sup>f</sup>Jedelsky et al, (2000);1055 <sup>g</sup>Kiss et al, (2005);1056 <sup>h</sup>Yates III and Wandruszka, (1999);

1057

1058

1059

1060

1061

1062

1063

1064

1065

1066

1067

1068 **Table 2.** The chemical composition of biomass-burning model mixtures studied given as mass  
1069 percentages (wt %).

| Mixture name | Levoglucosan | 4-Hydroxybenzoic acid | Humic acid | Ammonium sulfate |
|--------------|--------------|-----------------------|------------|------------------|
| Mix-bio-dry  | 87.2%        | 9.2%                  | 1.5%       | 2.1%             |
| Mix-bio-wet  | 68.0%        | 26.0%                 | 3.0%       | 3.0%             |

1070

1071

1072

1073

1074

1075

1076

1077

1078

1079

1080

1081

1082

1083

1084

1085

1086



1087

1088 **Table 3.** Coefficients ( $c_1$ ,  $c_2$ ,  $c_3$ ) of the fitted growth factor parameterization (Eq. 5) as follows:

| Chemical compounds    | $c_1$         | $c_2$        | $c_3$         |
|-----------------------|---------------|--------------|---------------|
| Levoglucosan          | 0.12868746    | 0.36582023   | -0.39840382   |
| 4-Hydroxybenzoic acid | -1.389967E-01 | 2.325586E-01 | -9.891943E-02 |
| Humic acid            | -1.618304E-02 | 2.202483E-01 | 2.005134E-02  |

1089

1090

1091

1092

1093

1094

1095

1096

1097

1098

1099

1100

1101

1102

1103

1104

1105

1106 **Table 4:** Experimental studies of organic and ammonium sulfate (AS) deliquescence and efflorescence  
 1107 RH from this work and previous studies at 298K.

| Signal compound/Mixture  | Organic mass fraction (%) | Deliquescence relative humidity of AS or organic in the mixed particle | Efflorescence relative humidity of AS or organic in the mixed particle |
|--------------------------|---------------------------|------------------------------------------------------------------------|------------------------------------------------------------------------|
| Levogluconan             | -                         | 80% <sup>a*</sup><br>82.8% <sup>b</sup>                                | < 4% <sup>a*</sup>                                                     |
| Levogluconan+AS          | 25                        | 80%                                                                    | 45%                                                                    |
|                          | 50                        | -                                                                      | -                                                                      |
|                          | 75                        | -                                                                      | -                                                                      |
| 4-hydroxybenzoic acid    | -                         | > 97% <sup>a*</sup>                                                    | < 4% <sup>a*</sup>                                                     |
|                          | 25                        | 80%                                                                    | 35%                                                                    |
| 4-Hydroxybenzoic acid+AS | 50                        | 80%                                                                    | 25%                                                                    |
|                          | 75                        | 80%                                                                    | -                                                                      |
|                          | -                         | -                                                                      | -                                                                      |
| Humic acid               | -                         | -                                                                      | -                                                                      |
|                          | 20                        | 80%                                                                    | 35%                                                                    |
| Humic acid+AS            | 50                        | 80%                                                                    | 35%                                                                    |
|                          | 75                        | 80%                                                                    | 35%                                                                    |

1108 <sup>\*</sup>is the DRH and ERH of pure organic components.

1109 <sup>a</sup>Mochida and Kawamura. (2004)

1110 <sup>b</sup>Zamora et al. (2011)

1111

1112

1113

1114

1115

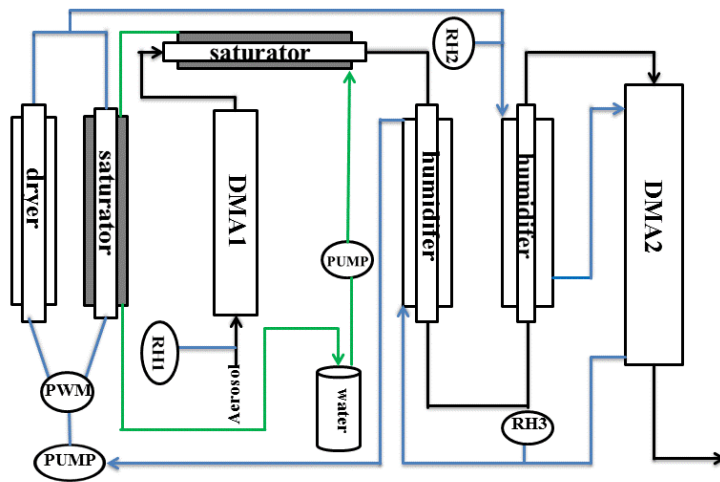

1116

1117 **Figure 1.** Schematic of the hygroscopicity tandem different mobility analyzer (HTDMA) system. the

1118 sheath flow, aerosol flow, and water flow have been represented by the blue, black, green line,

1119 respectively. PWM: Pulse Width Modulator circuit.

1120

1121

1122

1123

1124

1125

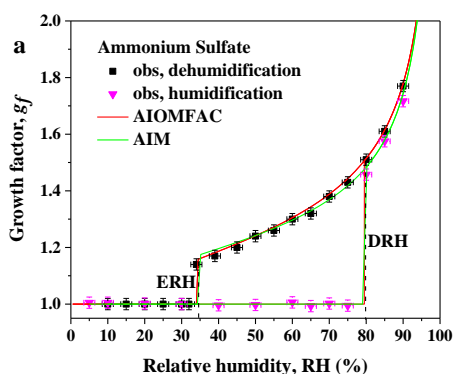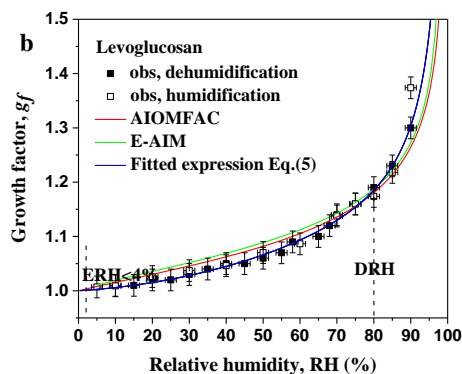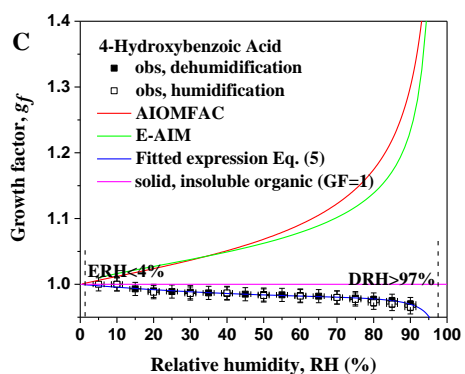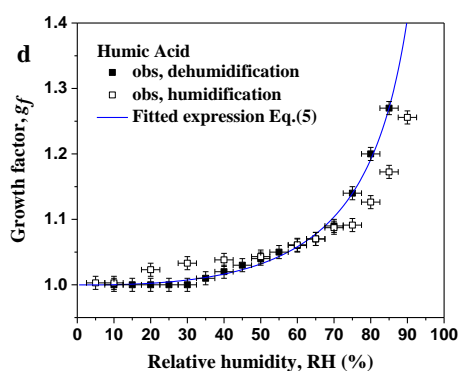

1126

1127

1128 **Figure 2.** Hygroscopic growth, deliquescence and efflorescence of aerosol particles. Hygroscopic growth  
 1129 factors of (a) ammonium sulfate (AS), (b) levoglucosan, (c) 4-hydroxybenzoic acid, and (d) humic acid  
 1130 aerosol particles with dry diameter of 100 nm (open, black square). In this study, the green curves show  
 1131 E-AIM predictions, and the red curves the AIOMFAC predictions, and the blue lines the fitted expression  
 1132 (Eq. 5).

1133

1134

1135

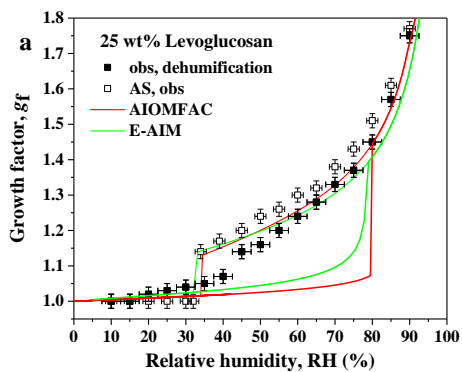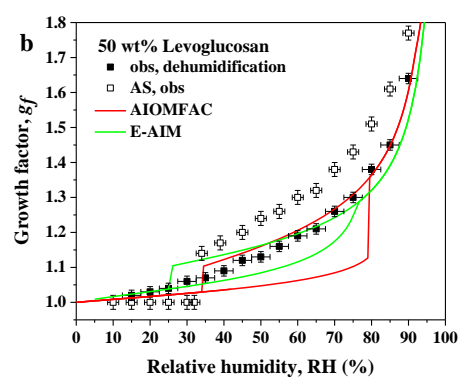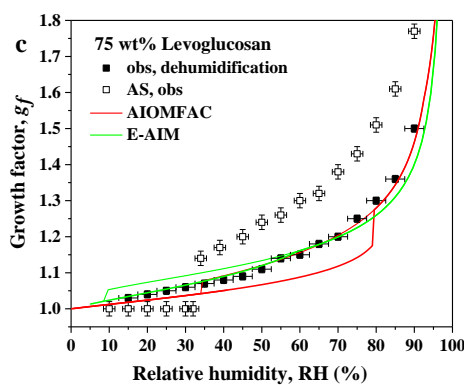

1136

1137

1138 **Figure 3.** Hygroscopic growth, efflorescence of aerosol particles, and model predictions represent the  
 1139 diameter growth factor during dehydration experiments in the range from 90 % to 5 % RH at 298.15 K.  
 1140 (a,b,c). Hygroscopic growth curves of mixtures consisting of levoglucosan and ammonium sulfate (solid  
 1141 symbols) at three different dry state mass fraction for particles of an initial dry diameter of 100 nm at RH  
 1142 < 5 %) as compared to that of pure ammonium sulfate (open symbols, “AS, obs”). AIOMFAC-based  
 1143 model predictions for bulk systems are shown in red, E-AIM predictions are shown in green.

1144

1145

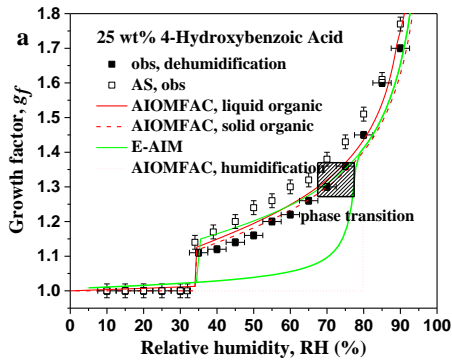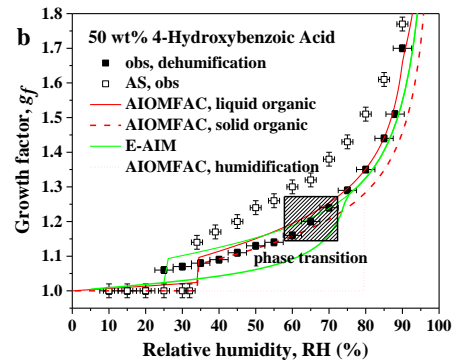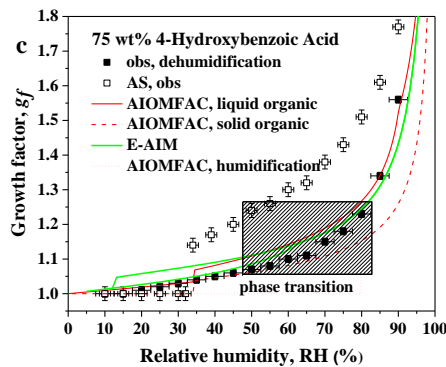

1146

1147

1148 **Figure 4.** Hygroscopic growth factors, efflorescence of behavior, and model predictions for dehydration  
 1149 experiments in the range from 90 % to 5 % RH at 298.15 K. **(a,b,c)** hygroscopic growth curves of  
 1150 mixtures consisting of 4-hydroxybenzoic acid and ammonium sulfate (solid symbols) at three different  
 1151 dry state mass fraction (initial dry diameter of 100 nm at RH < 5 %) as compared to that of pure  
 1152 ammonium sulfate (open symbols). AIOMFAC-based model predictions for bulk systems are shown in  
 1153 red, E-AIM-predictions are shown in green for the case of assuming that 4-hydroxybenzoic acid remains  
 1154 in the liquid state. Shaded rectangle: RH range of gradual crystallization of 4-hydroxybenzoic acid.

1155

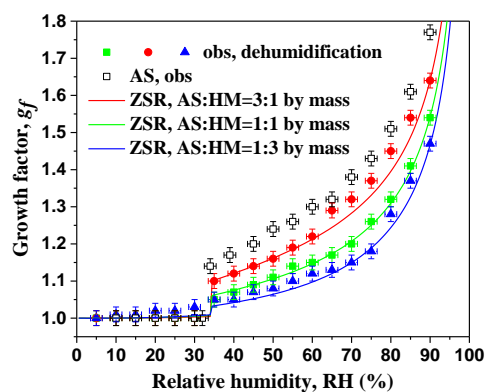

1156

1157 **Figure 5.** Hygroscopic growth factors, efflorescence of aerosol particles/constituents consisting of humic  
 1158 acid and ammonium sulfate at three different dry state mass fractions with initial dry diameter of 100 nm  
 1159 at  $RH < 5\%$  as compared to that of pure ammonium sulfate (open symbols). Colored curves: ZSR  
 1160 predictions of diameter growth factors for dry particle compositions corresponding to the experimental  
 1161 data during dehumidification in the range from 90 % to 5 % RH at 298.15 K.

1162

1163

1164

1165

1166

1167

1168

1169

1170

1171

1172

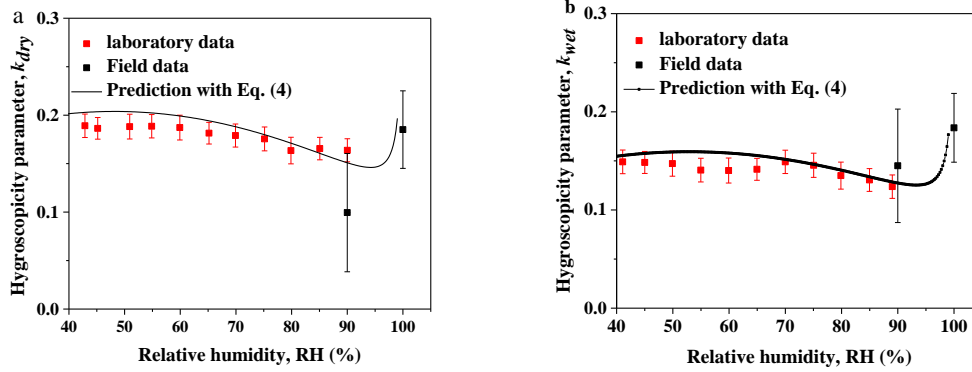

1173

1174 **Figure 6.** Hygroscopicity parameter,  $\kappa$ , representing mixed aerosol particles consisting of organic  
 1175 surrogate components and ammonium sulfate at different periods (initial dry diameter of 100 nm at RH  
 1176  $< 5\%$ ). The black curves in panels (a, b) show the  $\kappa$  prediction from Eq. (4) with  $HGF_{mix}$  calculated by  
 1177 Eq. (6) using component volume fractions and the HGF of the individual mixture components from a fit  
 1178 to the laboratory data (using Eq.5). the black symbols and error bars show field data from the Amazon  
 1179 during the dry and wet periods at conditions of water vapor sub-saturation (HTDMA measurement) and  
 1180 super-saturation ( $\kappa_{CNN}$ ) (Whitehead et al., 2016; Pöhlker et al., 2006).

1181

1182

1183
